# Supplementary material for: Synthesis and Biological Evaluation of 2-Substituted Quinazolin-4(3H)-Ones with Antiproliferative Activities
Source: MDPI journal article supplement (doi:10.3390/molecules28237912), 2023-12-02
Supplement: s1 [file s1]

## Supporting Information

# Synthesis and Biological Evaluation of Novel 2-Substituted Quinazolin-4(3H)-ones with Antiproliferative Activities

Maria Karelou<sup>1</sup>, Dionysis Kampasis<sup>1</sup>, Amalia. D. Kalampaliki<sup>1</sup>, Leentje Persoons<sup>2</sup>, Andreas Krämer<sup>3,4</sup>, Dominique Schols<sup>2</sup>, Stefan Knapp<sup>3,4</sup>, Steven De Jonghe<sup>2</sup>, Ioannis K. Kostakis<sup>1,\*</sup>

- 1 *Department of Pharmacy, Division of Pharmaceutical Chemistry, National and Kapodistrian University of Athens, Panepistimiopolis, Zografou, 15771 Athens, Greece.*
- 2 *KU Leuven, Department of Microbiology, Immunology and Transplantation, Rega Institute for Medical Research, Laboratory of Virology and Chemotherapy, Herestraat 49, box 1043, 3000 Leuven, Belgium.*
- 3 *Institute for Pharmaceutical Chemistry, Department of Biochemistry, Chemistry and Pharmacy, Goethe University Frankfurt, Max-von-Laue-Straße 9, 60438 Frankfurt, Germany*
- 4 *Structural Genomics Consortium, Buchmann Institute for Molecular Life Sciences, Goethe University Frankfurt, Max-von-Laue-Straße 15, 60438 Frankfurt, Germany*

Correspondence: [ikkostakis@pharm.uoa.gr](mailto:ikkostakis@pharm.uoa.gr); +30-210-727-4212

## Table of contents

|                                                      |    |
|------------------------------------------------------|----|
| Table S1: DFS results.....                           | 4  |
| Table S2: DFS results.....                           | 4  |
| Table S3: DFS results.....                           | 4  |
| Table S4: DFS results.....                           | 5  |
| Table S5: DFS results.....                           | 5  |
| Table S6: DFS results.....                           | 5  |
| Table S7: DFS results.....                           | 6  |
| Table S8: DFS results.....                           | 6  |
| Figure S1: $^1\text{H}$ NMR spectrum of 3 .....      | 7  |
| Figure S2: $^{13}\text{C}$ NMR spectrum of 3 .....   | 7  |
| Figure S3: $^1\text{H}$ NMR spectrum of 4 .....      | 8  |
| Figure S4: $^{13}\text{C}$ NMR spectrum of 4 .....   | 8  |
| Figure S5: $^1\text{H}$ NMR spectrum of 9 .....      | 9  |
| Figure S6: $^{13}\text{C}$ NMR spectrum of 9 .....   | 9  |
| Figure S7: $^1\text{H}$ NMR spectrum of 10 .....     | 10 |
| Figure S8: $^{13}\text{C}$ NMR spectrum of 10 .....  | 10 |
| Figure S9: $^1\text{H}$ NMR spectrum of 13 .....     | 11 |
| Figure S10: $^{13}\text{C}$ NMR spectrum of 13 ..... | 11 |
| Figure S11: $^1\text{H}$ NMR spectrum of 14 .....    | 12 |
| Figure S12: $^{13}\text{C}$ NMR spectrum of 14 ..... | 12 |
| Figure S13: $^1\text{H}$ NMR spectrum of 15 .....    | 13 |
| Figure S14: $^{13}\text{C}$ NMR spectrum of 15 ..... | 13 |
| Figure S15: $^1\text{H}$ NMR spectrum of 16 .....    | 14 |
| Figure S16: $^{13}\text{C}$ NMR spectrum of 16 ..... | 14 |
| Figure S17: $^1\text{H}$ NMR spectrum of 17 .....    | 15 |
| Figure S18: $^{13}\text{C}$ NMR spectrum of 17 ..... | 15 |
| Figure S19: $^1\text{H}$ NMR spectrum of 18 .....    | 16 |
| Figure S20: $^{13}\text{C}$ NMR spectrum of 18 ..... | 16 |
| Figure S21: $^1\text{H}$ NMR spectrum of 19 .....    | 17 |
| Figure S22: $^{13}\text{C}$ NMR spectrum of 19 ..... | 17 |
| Figure S23: $^1\text{H}$ NMR spectrum of 20 .....    | 18 |
| Figure S24: $^{13}\text{C}$ NMR spectrum of 20 ..... | 18 |
| Figure S25: $^1\text{H}$ NMR spectrum of 21 .....    | 19 |

|                                                      |    |
|------------------------------------------------------|----|
| Figure S26: $^{13}\text{C}$ NMR spectrum of 21 ..... | 19 |
| Figure S27: $^1\text{H}$ NMR spectrum of 22 .....    | 20 |
| Figure S28: $^{13}\text{C}$ NMR spectrum of 22 ..... | 20 |
| Figure S29: $^1\text{H}$ NMR spectrum of 25 .....    | 21 |
| Figure S30: $^{13}\text{C}$ NMR spectrum of 25 ..... | 21 |
| Figure S31: $^1\text{H}$ NMR spectrum of 26 .....    | 22 |
| Figure S32: $^{13}\text{C}$ NMR spectrum of 26 ..... | 22 |
| Figure S33: $^1\text{H}$ NMR spectrum of 27 .....    | 23 |
| Figure S34: $^{13}\text{C}$ NMR spectrum of 27 ..... | 23 |
| Figure S35: $^1\text{H}$ NMR spectrum of 28 .....    | 24 |
| Figure S36: $^{13}\text{C}$ NMR spectrum of 28 ..... | 24 |
| Figure S37: $^1\text{H}$ NMR spectrum of 29 .....    | 25 |
| Figure S38: $^{13}\text{C}$ NMR spectrum of 29 ..... | 25 |
| Figure S39: $^1\text{H}$ NMR spectrum of 30 .....    | 26 |
| Figure S40: $^{13}\text{C}$ NMR spectrum of 30 ..... | 26 |
| Figure S41: $^1\text{H}$ NMR spectrum of 31 .....    | 27 |
| Figure S42: $^{13}\text{C}$ NMR spectrum of 31 ..... | 27 |
| Figure S43: $^1\text{H}$ NMR spectrum of 32 .....    | 28 |
| Figure S44: $^{13}\text{C}$ NMR spectrum of 32 ..... | 28 |
| Figure S45: $^1\text{H}$ NMR spectrum of 33 .....    | 29 |
| Figure S46: $^{13}\text{C}$ NMR spectrum of 33 ..... | 29 |
| Figure S47: $^1\text{H}$ NMR spectrum of 34 .....    | 30 |
| Figure S48: $^{13}\text{C}$ NMR spectrum of 34 ..... | 30 |
| Figure S49: $^1\text{H}$ NMR spectrum of 35 .....    | 31 |
| Figure S50: $^{13}\text{C}$ NMR spectrum of 35 ..... | 31 |
| Figure S51: $^1\text{H}$ NMR spectrum of 36 .....    | 32 |
| Figure S52: $^{13}\text{C}$ NMR spectrum of 36 ..... | 32 |

| Cpd Name      | Kinases |           |       |        |        |       |       |        |         |        |         |          |
|---------------|---------|-----------|-------|--------|--------|-------|-------|--------|---------|--------|---------|----------|
|               | CAMK4A  | CDC42BPAA | CDK2A | CDKL1A | CHEK2A | CLK1A | CLK3A | DYRK2A | CSNK1EA | EPHA4A | FECHHSF | HIPK2HSF |
| 17            | -0.3    | -1.3      | 0.8   | 0.4    | 1.4    | 4.6   | -0.1  | 2.3    | 1.2     | 0.3    | 0.2     | 1.1      |
| 21            | -0.4    | -0.8      | 1.2   | 0.5    | 1.2    | 3.9   | 0.8   | 2.5    | 1.4     | -0.1   | -2.4    | 0.8      |
| 19            | 0.7     | -0.5      | 1.4   | 0.7    | 1.7    | 3.1   | 1.6   | 1.4    | 0.7     | 0.1    | 0.8     | 1.2      |
| 34            | -0.5    | -1.2      | 0.5   | 0.1    | 0.6    | 3.2   | 0.1   | 1.6    | 1.3     | -0.2   | 2.1     | 0.7      |
| 20            | -0.4    | -0.7      | 0.0   | 0.3    | 0.5    | 2.1   | -0.1  | 1.1    | 0.6     | -0.1   | 2.4     | 0.5      |
| 35            | -0.5    | -0.9      | 0.3   | 0.4    | 0.4    | 2.4   | 0.0   | 1.4    | 1.4     | 0.1    | 6.3     | 0.6      |
| 18            | -0.4    | -0.7      | 0.2   | 0.5    | 1.4    | 3.4   | 0.0   | 1.5    | 1.3     | 0.4    | 4.0     | 0.6      |
| 33            | -0.3    | -0.7      | 0.5   | 0.4    | 0.3    | 2.1   | 0.4   | 1.1    | 1.2     | 0.0    | 4.5     | 0.6      |
| 30            | 0.2     | -0.4      | 0.9   | 0.3    | 2.6    | 4.6   | 1.5   | 3.7    | 2.1     | 0.3    | 3.1     | 2.0      |
| 32            | -0.5    | -1.2      | 0.5   | 0.2    | 0.4    | 2.5   | 0.0   | 1.1    | 1.1     | -0.4   | 0.2     | 0.5      |
| 31            | -0.7    | -0.2      | 0.2   | 0.6    | 0.5    | 2.5   | 0.5   | 1.0    | 0.5     | -0.4   | 1.5     | 0.5      |
| 25            | -0.6    | -0.5      | 0.6   | 0.5    | 0.9    | 4.2   | 1.3   | 3.8    | 2.2     | 0.0    | 2.1     | 2.3      |
| 37            | 0.0     | -0.3      | 0.6   | 0.7    | 0.0    | 0.0   | -0.3  | 0.3    | 0.9     | 0.1    | 0.8     | 0.6      |
| 36            | -0.3    | -0.9      | 0.4   | 0.3    | -0.1   | 0.3   | -0.4  | 0.4    | 1.0     | 0.0    | -0.9    | 0.3      |
| Staurosporine | 7.1     | 2.6       | 15.2  | 4.2    | 16.5   | 11.9  | 5.3   | 7.0    | 3.1     | 5.6    | 2.1     | 4.6      |

Table S1: DFS results

| Cpd Name      | Kinases |       |        |          |        |        |        |        |        |        |      |
|---------------|---------|-------|--------|----------|--------|--------|--------|--------|--------|--------|------|
|               | MSSK1A  | NQO2A | DAPK1A | DCAMKL1A | DMPK1A | EPHA5A | EPHA7A | EPHB3A | FGFR1B | FGFR2A | GAKA |
| 17            | 1.0     | -0.1  | 1.3    | -0.7     | -0.2   | 0.3    | -3.2   | 1.0    | 0.2    | 0.0    | 4.7  |
| 21            | 0.2     | 0.2   | 0.4    | -1.4     | -0.4   | 0.1    | -2.7   | 0.3    | 0.3    | 0.1    | 3.9  |
| 19            | 0.3     | 0.4   | 0.8    | -1.1     | -0.5   | 0.3    | -2.3   | 1.1    | 0.5    | 0.4    | 2.4  |
| 34            | 0.2     | -0.5  | -0.1   | -1.5     | -0.4   | -0.7   | -3.9   | 0.5    | 0.1    | 0.0    | 2.0  |
| 20            | 0.1     | 0.2   | 0.0    | 0.3      | -0.3   | -0.3   | -3.4   | 1.0    | 0.1    | -0.3   | 1.0  |
| 35            | 0.0     | 0.0   | 0.2    | -0.7     | 0.1    | -0.1   | -3.0   | 1.0    | 0.3    | 0.1    | 1.4  |
| 18            | 0.5     | 0.0   | 0.8    | 0.2      | 0.5    | -0.1   | -3.0   | 1.3    | 0.2    | -0.1   | 2.0  |
| 33            | 0.1     | 0.4   | 0.9    | -0.4     | 1.6    | 0.2    | -2.3   | 0.5    | 0.3    | -0.1   | 1.3  |
| 30            | 0.4     | -0.1  | 0.8    | 0.2      | 0.6    | 0.4    | -2.7   | 0.6    | 0.1    | -0.4   | 2.8  |
| 32            | 0.1     | -0.2  | -0.2   | -1.3     | -0.6   | -0.3   | -3.8   | 0.2    | 0.2    | -0.2   | 1.5  |
| 31            | 0.0     | 0.3   | 0.1    | 0.0      | -0.2   | -0.5   | -2.5   | -0.4   | -0.2   | -0.4   | 0.6  |
| 25            | 0.0     | -0.4  | 1.0    | -0.5     | 0.1    | -0.5   | -2.7   | 0.6    | 0.0    | -0.4   | 2.8  |
| 37            | 0.0     | 0.0   | -0.4   | -2.0     | -0.1   | -0.3   | -2.3   | 0.6    | 0.0    | -0.1   | -0.2 |
| 36            | 0.3     | 0.3   | -0.5   | -2.5     | -0.9   | -0.4   | -4.0   | 3.1    | 0.2    | -0.1   | 0.3  |
| Staurosporine | 3.7     | -0.2  | 9.0    | 11.8     | 8.2    | 7.7    | 9.5    | 5.5    | 6.4    | 8.4    | 8.9  |

Table S2: DFS results

| Cpd Name      | Kinases |         |      |       |      |        |        |        |       |       |        |
|---------------|---------|---------|------|-------|------|--------|--------|--------|-------|-------|--------|
|               | DAPK3A  | DYRK1AA | FESA | GSG2A | TTKA | EPHA2A | MAPK1A | MERTKA | MST3A | MST4A | GPRK5A |
| 17            | 2.0     | 4.0     | 0.1  | 2.6   | 0.2  | 1.1    | -0.1   | -0.7   | 0.6   | 0.3   | 1.0    |
| 21            | 2.1     | 3.2     | 0.2  | 1.5   | -0.2 | 0.8    | -0.2   | -0.6   | 0.7   | 0.3   | 1.5    |
| 19            | 4.1     | 5.0     | 0.9  | 0.8   | 0.3  | 0.8    | -0.4   | -0.5   | 3.0   | 1.1   | 1.2    |
| 34            | 1.4     | 2.7     | 0.0  | 3.1   | -0.3 | 0.7    | -0.4   | -1.1   | 0.4   | 0.3   | 0.5    |
| 20            | 0.9     | 2.2     | 0.0  | -0.4  | -0.2 | 0.5    | -0.5   | -0.8   | 0.3   | 0.0   | 0.3    |
| 35            | 1.2     | 2.4     | -0.1 | 0.4   | -0.4 | 0.6    | -0.3   | -0.8   | 0.2   | 0.0   | 0.7    |
| 18            | 1.3     | 2.3     | 0.5  | -0.1  | -1.2 | 0.7    | -0.2   | -0.6   | -0.1  | -0.2  | 0.4    |
| 33            | 2.0     | 2.0     | 0.1  | 0.3   | -0.1 | 0.7    | -0.3   | -0.3   | 0.4   | 0.1   | 0.5    |
| 30            | 2.1     | 2.8     | 0.0  | 3.1   | 0.2  | 0.8    | -0.2   | 0.0    | 0.8   | 0.3   | 0.7    |
| 32            | 1.6     | 2.0     | -0.2 | 3.0   | -0.4 | 0.6    | -0.3   | -1.0   | 0.0   | -0.2  | 0.3    |
| 31            | 0.5     | 1.4     | -0.3 | 0.3   | -2.0 | 0.2    | -0.3   | -0.7   | 0.1   | 0.1   | -0.2   |
| 25            | 1.7     | 5.3     | 0.0  | 2.9   | -0.1 | 0.7    | -0.2   | -0.5   | 0.2   | 0.2   | 0.7    |
| 37            | 0.4     | -0.4    | -0.1 | 0.5   | -0.6 | 0.6    | -0.4   | -1.0   | 0.3   | 0.1   | 0.3    |
| 36            | 0.2     | 1.2     | 0.0  | 0.8   | -0.2 | 0.5    | -0.2   | -1.5   | -0.1  | 0.5   | -0.1   |
| Staurosporine | 16.3    | 12.8    | 7.7  | 2.3   | 8.4  | 7.4    | 1.3    | 5.7    | 9.1   | 7.8   | 8.0    |

Table S3: DFS results

| Cpd Name      | Kinases |         |         |         |         |         |         |        |        |         |       |
|---------------|---------|---------|---------|---------|---------|---------|---------|--------|--------|---------|-------|
|               | GSK3BB  | MAP2K4A | MAP2K6A | MAP3K5A | MAPK10A | MAPK13A | MAPK14A | MAPK8B | MAPK9A | MAP2K7A | TLK1A |
| 17            | 5.1     | 1.0     | 0.2     | 2.7     | -1.2    | 0.7     | -0.2    | 1.5    | 0.8    | -0.8    | -1.7  |
| 21            | 4.7     | 2.0     | 0.3     | 1.7     | -0.2    | 0.4     | 0.1     | 2.5    | 1.2    | -0.7    | -1.0  |
| 19            | 2.4     | 2.3     | 0.7     | 2.0     | -2.1    | 0.5     | 0.4     | 1.1    | -0.5   | 0.9     | -0.4  |
| 34            | 2.4     | 0.8     | 0.2     | 0.3     | -3.9    | 0.4     | -0.4    | -0.8   | -0.5   | -1.0    | -2.1  |
| 20            | 4.1     | 0.9     | 0.2     | 0.3     | -3.3    | 0.5     | -0.5    | -0.8   | -0.4   | -0.2    | -1.7  |
| 35            | 2.6     | 0.9     | 0.2     | 0.2     | -3.1    | 0.4     | -0.3    | -0.4   | -0.3   | -0.3    | -1.8  |
| 18            | 3.9     | 0.8     | 0.3     | 0.7     | -1.1    | 0.8     | -0.3    | 0.9    | 0.2    | 0.1     | -1.7  |
| 33            | 2.1     | 0.6     | 0.2     | 0.3     | -2.5    | 0.5     | 0.0     | 0.0    | -0.4   | -0.1    | -1.6  |
| 30            | 3.0     | 1.1     | 0.2     | 5.1     | -0.6    | 0.4     | 0.1     | 1.8    | -0.2   | 0.1     | -1.1  |
| 32            | 1.5     | 1.3     | 0.0     | 0.3     | -3.9    | 0.3     | -0.5    | -0.4   | -0.5   | -0.4    | -2.0  |
| 31            | 0.8     | 0.2     | 0.1     | 0.8     | -2.3    | 0.3     | -0.4    | 0.6    | -0.5   | -0.8    | -1.8  |
| 25            | 3.7     | 1.2     | 0.3     | 1.9     | -1.2    | 0.5     | -0.1    | 1.6    | 0.4    | -0.6    | -1.3  |
| 37            | 0.9     | 0.6     | 0.1     | 0.0     | -2.8    | 0.4     | -0.3    | -0.6   | -0.9   | -0.7    | -1.6  |
| 36            | 0.5     | 0.4     | 0.0     | -0.2    | -4.9    | 0.4     | -0.6    | -1.3   | -0.7   | -1.5    | -1.7  |
| Staurosporine | 11.2    | 11.5    | 11.8    | 16.9    | 4.7     | 6.5     | 0.9     | 8.0    | 3.2    | 8.3     | 8.5   |

Table S4: DFS results

| Cpd Name      | Kinases |        |       |       |       |         |       |       |       |       |        |
|---------------|---------|--------|-------|-------|-------|---------|-------|-------|-------|-------|--------|
|               | MARK3A  | MARK4A | MELKA | NEK1A | NEK2A | NEK7A_2 | OSR1A | PAK1A | PIM3A | FLT1A | PCTK1A |
| 17            | -1.0    | -0.6   | 1.8   | 0.1   | 0.4   | -2.6    | -0.2  | -0.1  | 3.2   | 2.3   | 1.0    |
| 21            | -0.6    | -0.3   | 0.9   | -0.5  | 1.1   | -1.2    | 0.2   | 1.2   | 6.5   | 1.3   | 1.2    |
| 19            | 0.3     | -0.4   | 1.4   | 0.5   | 1.7   | 0.3     | 1.0   | 1.2   | 3.0   | 1.3   | 0.2    |
| 34            | -0.3    | -0.5   | 1.6   | 0.1   | 0.5   | -2.2    | -0.4  | 0.3   | 2.5   | 1.4   | 0.4    |
| 20            | -1.1    | -1.1   | 0.9   | 0.0   | 0.4   | -1.8    | -0.2  | 0.4   | 1.0   | 1.3   | 0.1    |
| 35            | -0.8    | -0.6   | 0.8   | 0.2   | 0.6   | -1.4    | -0.4  | 0.4   | 3.5   | 1.2   | 0.4    |
| 18            | -0.8    | -1.0   | 0.7   | 0.5   | 0.8   | -1.4    | -0.1  | 0.6   | 1.2   | 1.4   | 0.6    |
| 33            | -0.7    | -0.9   | 1.0   | -0.5  | 0.4   | -1.8    | -0.1  | 0.4   | 2.9   | 1.2   | 0.4    |
| 30            | -0.4    | 0.0    | 1.7   | 0.2   | 0.8   | -0.5    | 0.3   | 0.4   | 3.0   | 2.5   | 0.6    |
| 32            | -1.6    | -0.8   | 1.0   | -0.1  | 1.5   | -2.0    | -0.6  | 0.1   | 1.9   | 1.5   | 0.2    |
| 31            | -0.3    | -0.7   | 0.4   | -0.2  | 0.5   | -1.1    | -0.2  | 0.1   | 1.2   | 1.1   | -0.1   |
| 25            | -0.7    | -0.2   | 1.0   | 0.0   | 0.6   | -0.6    | -0.1  | 0.3   | 2.7   | 1.0   | 0.6    |
| 37            | -0.9    | -1.0   | 0.1   | -0.1  | 1.1   | -1.2    | -0.1  | 1.1   | 2.7   | 0.2   | 0.4    |
| 36            | -0.7    | -0.6   | -0.1  | -0.1  | 0.5   | -2.2    | -0.6  | 0.1   | 2.8   | 0.5   | 0.4    |
| Staurosporine | 18.1    | 15.8   | 12.8  | -0.2  | 4.6   | 1.4     | 6.1   | 7.8   | 19.6  | 13.5  | 9.3    |

Table S5: DFS results

| Cpd Name      | Kinases |       |          |      |      |        |       |        |       |          |        |       |
|---------------|---------|-------|----------|------|------|--------|-------|--------|-------|----------|--------|-------|
|               | PKMYT1A | PLK4A | RPS6KA5A | SLKA | SRCA | SRPK1A | PAK4A | PHKG2A | PIM1A | RPS6KA1A | STK10A | MAPK7 |
| 17            | -0.3    | 1.8   | 0.6      | -1.2 | 0.2  | 0.3    | -0.2  | 2.3    | 2.6   | 1.3      | -1.0   | -0.2  |
| 21            | 0.6     | 1.3   | 0.3      | -0.3 | 0.5  | 0.3    | -0.3  | 1.0    | 5.4   | 0.6      | -0.2   | -0.2  |
| 19            | 0.2     | 0.9   | 3.4      | 1.1  | 0.4  | 0.8    | -0.3  | 1.4    | 2.2   | 0.3      | 1.2    | -0.2  |
| 34            | 0.1     | 1.3   | 2.2      | -1.3 | 0.2  | 0.0    | -0.5  | 1.1    | 1.3   | 0.5      | -0.9   | 0.0   |
| 20            | -0.9    | 1.1   | 1.0      | -1.0 | -0.4 | -0.1   | -1.1  | 0.1    | 1.0   | -0.2     | -1.2   | -0.1  |
| 35            | 0.0     | 1.1   | 3.0      | -1.2 | 0.0  | 0.0    | -0.9  | 0.3    | 1.6   | 0.3      | -0.9   | -0.2  |
| 18            | -0.3    | 1.0   | -1.0     | -1.2 | 0.0  | 0.3    | -0.8  | 0.2    | 1.1   | 0.7      | -0.8   | -0.4  |
| 33            | -0.2    | 0.5   | 2.7      | -0.7 | -0.1 | 0.2    | -0.3  | 0.5    | 1.4   | 0.2      | -0.9   | 0.1   |
| 30            | -0.1    | 2.5   | 2.5      | -0.4 | 0.3  | 0.5    | -0.1  | 2.5    | 3.6   | 2.2      | -0.6   | 0.0   |
| 32            | 0.0     | 0.8   | 1.4      | -1.3 | 0.1  | 0.0    | -0.5  | 0.9    | 1.6   | 0.3      | -1.2   | 0.2   |
| 31            | -1.1    | 0.5   | 0.7      | -1.1 | -0.3 | -0.1   | -0.5  | 0.3    | 1.3   | 0.3      | -0.9   | 0.2   |
| 25            | -0.1    | 1.6   | 4.1      | -0.8 | 0.1  | 0.2    | -0.2  | 1.3    | 2.8   | 1.3      | -1.2   | -0.1  |
| 37            | 0.1     | 0.2   | -0.4     | -0.5 | 0.1  | 0.2    | -0.4  | 0.2    | 1.3   | 0.1      | -0.5   | -0.2  |
| 36            | 0.1     | 0.2   | -0.2     | -1.3 | 0.3  | -0.2   | -0.1  | -0.3   | 1.3   | -0.1     | -1.2   | 0.3   |
| Staurosporine | 0.5     | 21.5  | 15.3     | 15.3 | 5.4  | 6.7    | 11.3  | 22.0   | 12.3  | 3.2      | 22.7   |       |

Table S6: DFS results

| Cpd Name      | Kinases |        |        |         |         |         |         |         |        |       |       |      |
|---------------|---------|--------|--------|---------|---------|---------|---------|---------|--------|-------|-------|------|
|               | AKT3A   | BMP2KA | BMPR2A | CAMK1DA | CAMK1GA | STK17AA | STK17BA | STK38LA | STK39A | BRD4A | STK3A | MEK5 |
| 17            | 0.1     | 9.0    | 3.2    | -2.2    | -0.1    | 3.2     | -2.2    | -0.3    | -0.8   | -1.3  | 0.8   | 5.3  |
| 21            | 0.2     | 7.0    | 2.6    | -2.4    | 0.2     | 2.2     | -1.2    | 0.0     | -0.2   | -1.0  | 1.4   | 2.8  |
| 19            | 0.4     | 3.3    | 1.8    | -1.5    | 1.1     | 1.4     | -0.7    | 0.3     | 0.5    | -0.4  | 2.1   | 5.2  |
| 34            | 0.2     | 4.5    | 1.4    | -2.4    | -0.3    | 1.6     | -2.8    | -0.4    | -0.8   | -0.9  | 0.5   | 3.3  |
| 20            | -0.1    | 1.3    | 1.5    | -1.8    | -0.3    | 0.1     | -3.2    | -0.2    | -0.6   | -1.9  | 0.0   | 1.5  |
| 35            | 0.0     | 2.5    | 0.9    | -2.2    | 0.4     | 1.1     | -2.8    | -0.3    | -0.6   | -1.0  | 1.0   | 2.2  |
| 18            | 0.3     | 4.8    | 2.1    | -2.0    | 0.1     | 0.8     | -2.1    | -0.4    | -0.9   | -1.2  | 0.5   | 2.8  |
| 33            | 0.2     | 1.8    | 0.4    | -2.1    | 0.3     | 1.8     | -1.7    | -0.3    | -0.9   | -1.3  | 0.4   | 1.7  |
| 30            | 0.0     | 7.0    | 2.8    | -1.9    | 0.1     | 3.8     | -0.6    | -0.1    | -0.7   | -2.5  | 0.2   | 6.1  |
| 32            | 0.2     | 2.8    | 0.6    | -2.6    | 0.0     | 1.5     | -3.2    | -0.2    | -0.9   | -0.6  | 0.0   | 2.2  |
| 31            | 0.0     | 1.3    | 0.8    | -1.9    | -0.3    | 0.7     | -0.6    | 0.1     | -0.6   | -1.1  | -1.6  | 2.5  |
| 25            | 0.0     | 5.0    | 2.8    | -1.8    | -0.1    | 2.6     | 0.1     | -0.1    | -0.8   | -0.7  | 1.0   | 6.5  |
| 37            | 0.3     | 0.0    | 0.2    | -1.0    | -0.8    | -0.4    | -2.6    | -0.1    | -0.9   | -0.7  | 0.0   | 1.5  |
| 36            | 0.2     | 0.8    | 0.3    | -3.4    | -1.1    | -0.5    | -4.1    | -0.2    | -0.7   | -1.2  | -0.7  | 0.6  |
| Staurosporine | 6.8     | 18.3   | 2.5    | 9.2     | 10.7    | 12.3    | 11.1    | 0.3     | 8.7    | 0.5   | 16.1  |      |

Table S7: DFS results

| Cpd Name      | Kinases |       |       |       |       |        |        |          |           |       |         |      |
|---------------|---------|-------|-------|-------|-------|--------|--------|----------|-----------|-------|---------|------|
|               | STK4A   | STK6A | ULK3A | VRK1A | WNK1A | BRPF1B | EPHB1A | MAPK15HS | MAPKAPK2A | TAF1A | CSNK1G2 | MEK1 |
| 17            | 1.4     | 1.6   | 4.2   | 0.8   | -0.5  | -1.2   | 0.7    | 2.3      | 0.1       | 0.2   | 1.8     | 0.2  |
| 21            | 1.4     | 0.8   | 1.8   | 0.7   | -0.8  | -0.7   | 0.3    | 1.4      | 0.1       | 0.3   | 1.8     | 0.1  |
| 19            | 1.7     | 1.6   | 3.0   | 1.1   | 0.4   | -0.2   | 0.7    | 0.7      | 0.6       | 0.5   | 1.1     | 0.1  |
| 34            | 0.3     | 0.0   | 2.1   | 0.5   | -0.6  | -1.3   | 0.1    | 1.0      | -0.2      | 0.1   | 1.4     | 0.0  |
| 20            | -0.3    | 0.3   | 1.3   | 0.5   | -0.3  | -1.7   | 0.9    | -0.4     | -0.2      | 0.0   | 0.8     | -0.1 |
| 35            | 0.3     | 0.0   | 1.5   | 0.4   | -0.4  | -1.0   | 0.6    | -0.2     | -0.2      | 0.3   | 0.7     | 0.2  |
| 18            | 0.5     | 0.7   | 1.5   | 0.4   | -0.1  | -1.3   | 1.0    | 0.0      | 0.0       | 0.2   | 1.0     | -0.3 |
| 33            | 0.0     | 0.3   | 1.6   | 0.6   | -0.4  | -1.2   | 0.5    | 0.6      | -0.1      | 0.0   | 0.9     | 0.1  |
| 30            | 1.5     | 1.6   | 5.4   | 0.8   | -0.4  | -1.2   | 0.3    | 2.1      | 0.4       | 0.3   | 2.5     | 0.3  |
| 32            | 0.2     | -0.4  | 1.7   | 0.4   | -0.6  | -1.3   | 0.1    | 1.0      | -0.2      | 0.0   | 0.9     | -0.2 |
| 31            | -0.5    | -0.1  | 1.7   | 0.3   | -0.4  | -1.8   | -0.4   | 0.1      | -0.2      | -1.1  | 0.7     | 0.3  |
| 25            | 1.3     | 1.0   | 4.1   | 0.7   | -0.5  | -1.5   | 0.4    | 1.7      | 0.0       | 0.2   | 2.2     | 0.2  |
| 37            | 0.4     | -0.3  | 0.9   | -0.2  | -0.3  | -1.1   | -0.1   | -0.4     | -0.1      | -0.1  | 0.6     | 0.2  |
| 36            | -0.2    | -0.5  | 0.8   | 0.2   | -0.4  | -0.8   | 0.1    | 0.2      | -0.3      | 0.2   | 0.9     | 0.3  |
| Staurosporine | 15.7    | 16.9  | 19.0  | 3.2   | 1.2   | 0.0    | 6.2    | 14.2     | 3.5       | 0.0   | 2.0     |      |

Table S8: DFS results

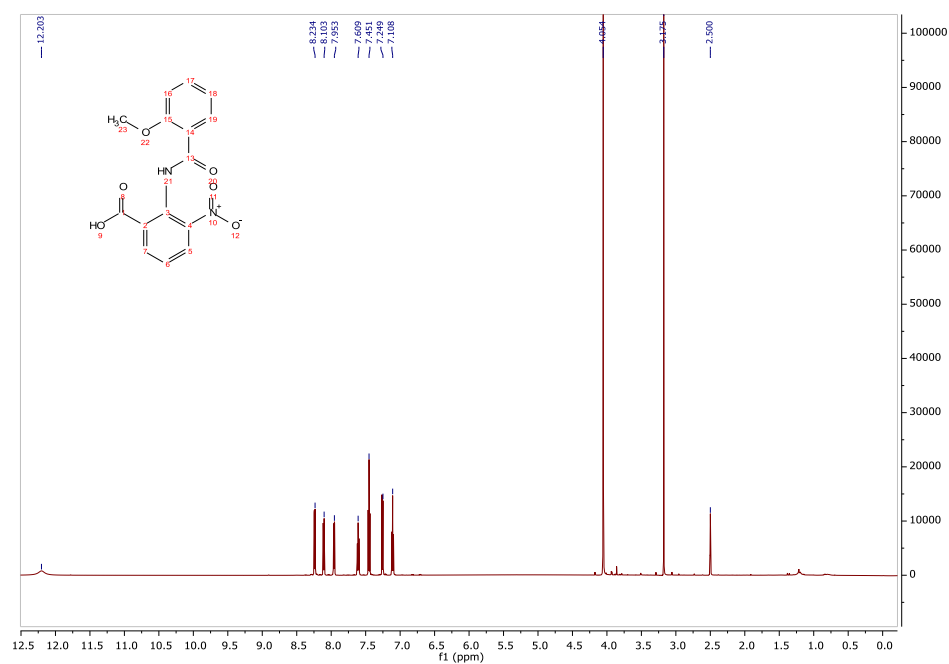

Figure S1: <sup>1</sup>H NMR spectrum of 3

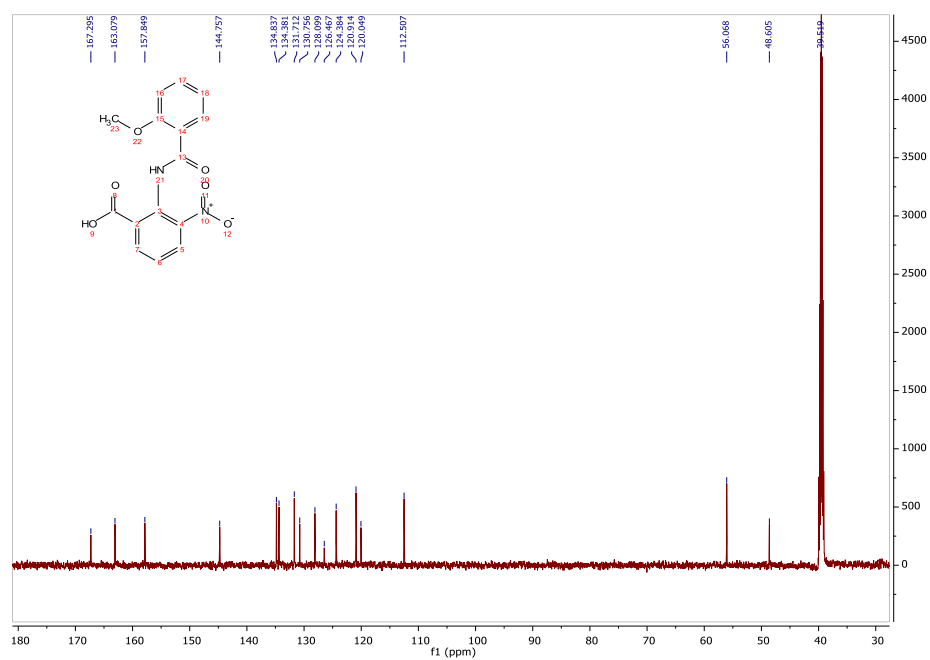

Figure S2: <sup>13</sup>C NMR spectrum of 3

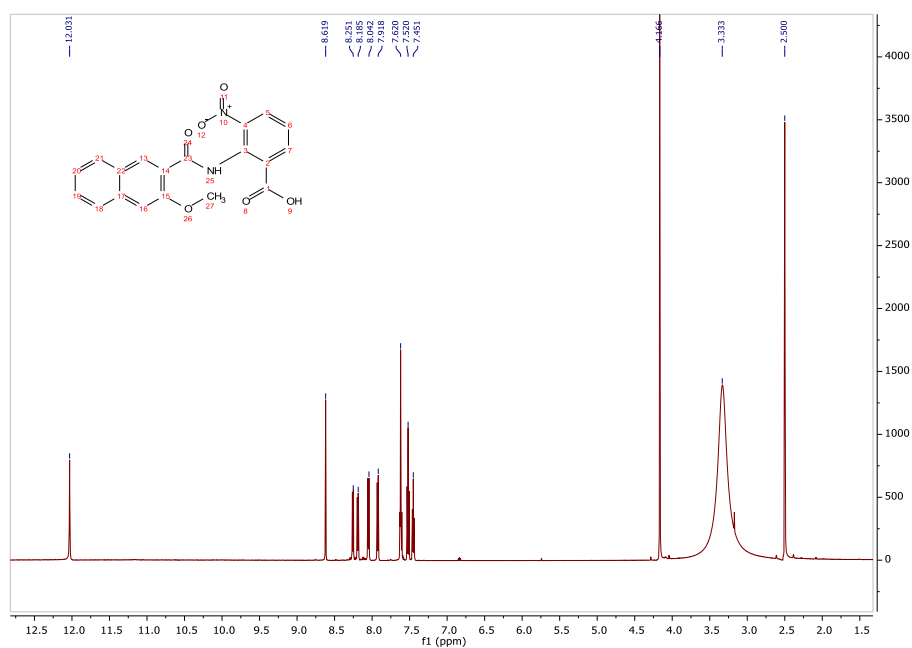

Figure S3: <sup>1</sup>H NMR spectrum of 4

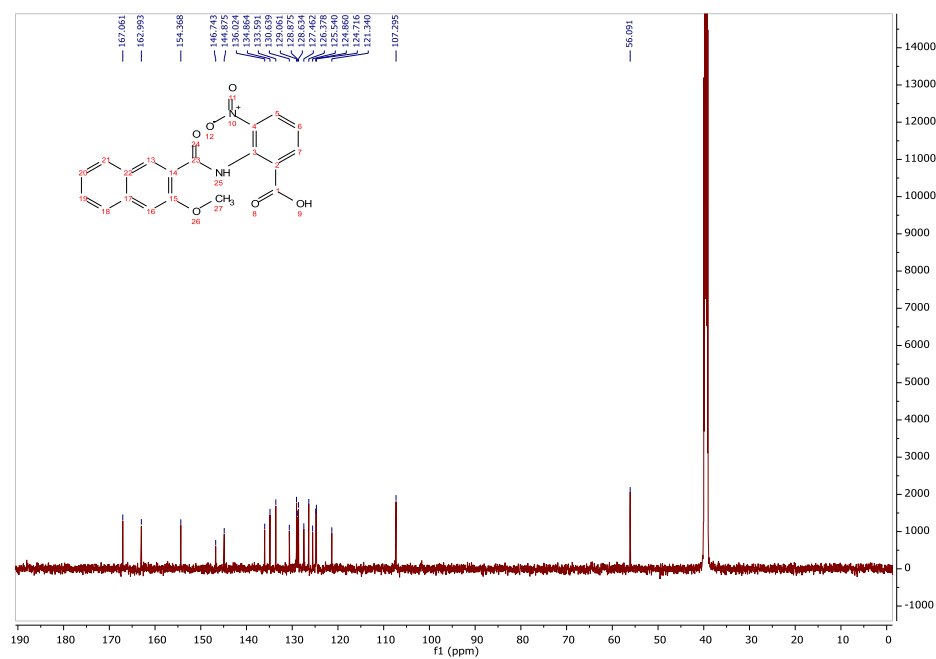

Figure S4: <sup>13</sup>C NMR spectrum of 4



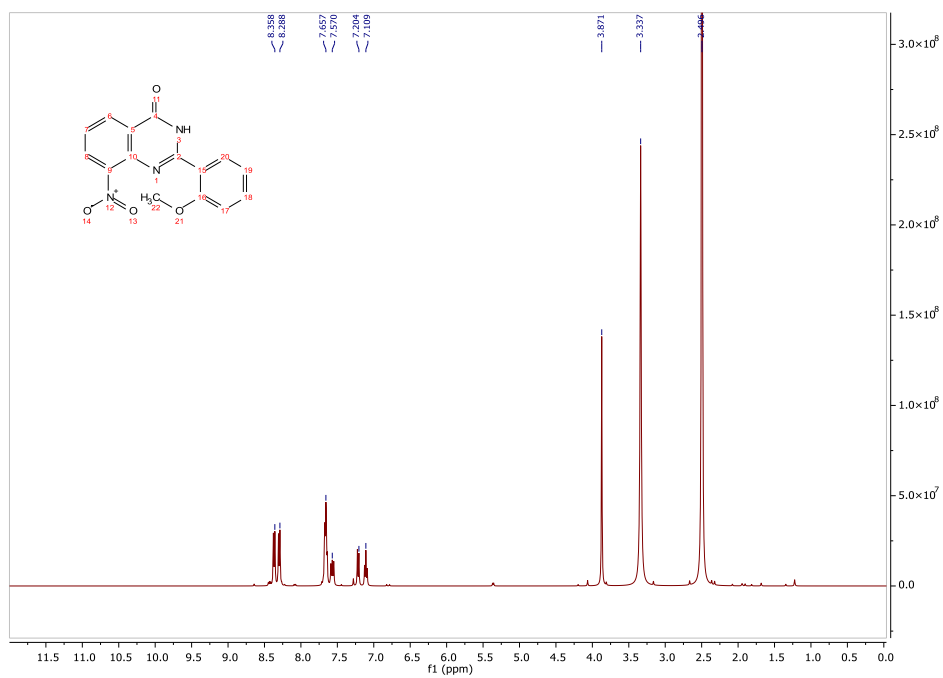

Figure S5:  $^1\text{H}$  NMR spectrum of 9

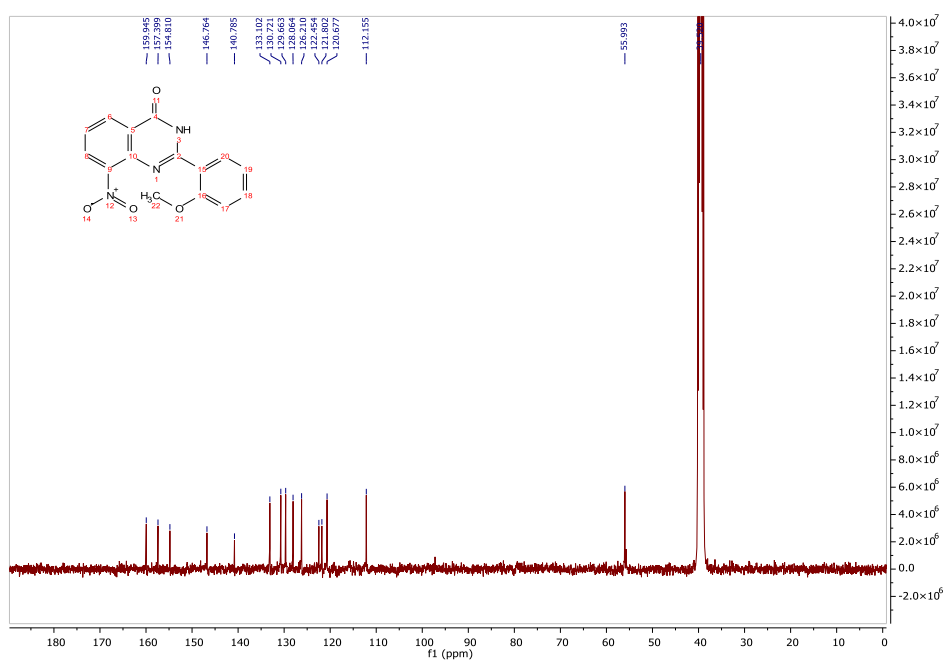

Figure S6:  $^{13}\text{C}$  NMR spectrum of 9

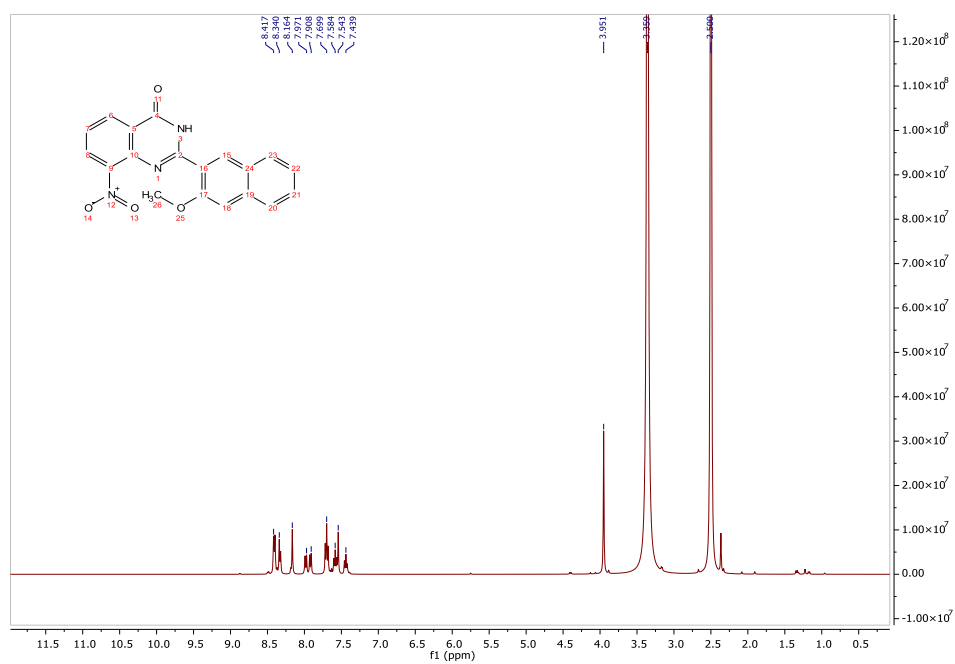

Figure S7:  $^1\text{H}$  NMR spectrum of 10

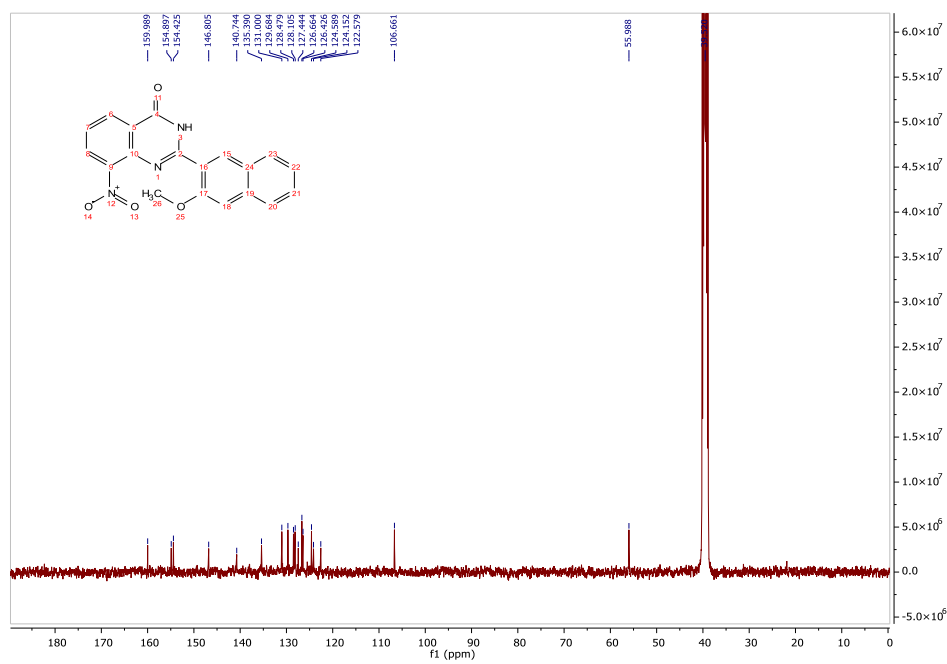

Figure S8:  $^{13}\text{C}$  NMR spectrum of 10

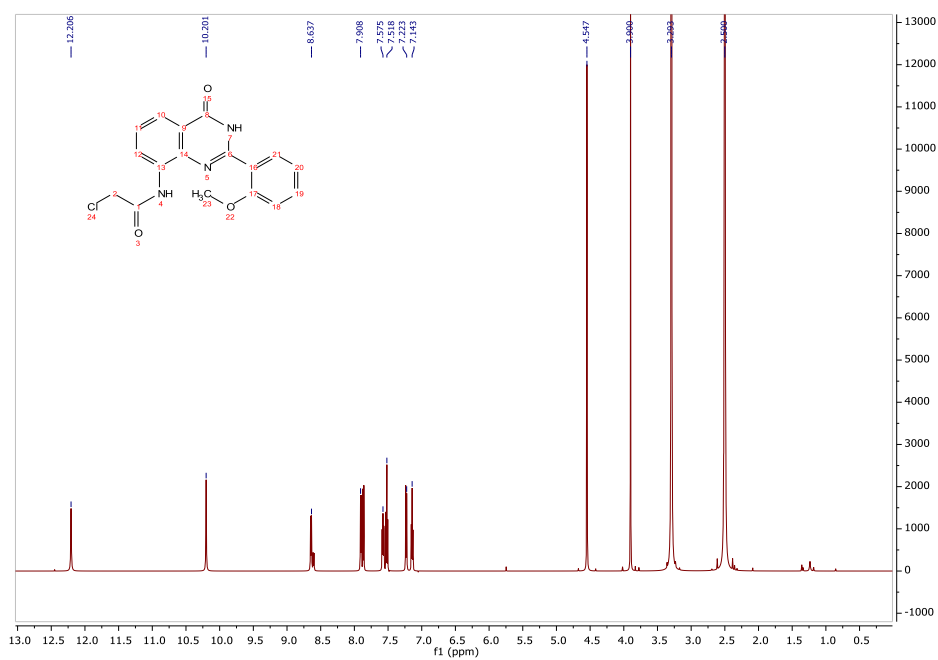

Figure S9: <sup>1</sup>H NMR spectrum of 13

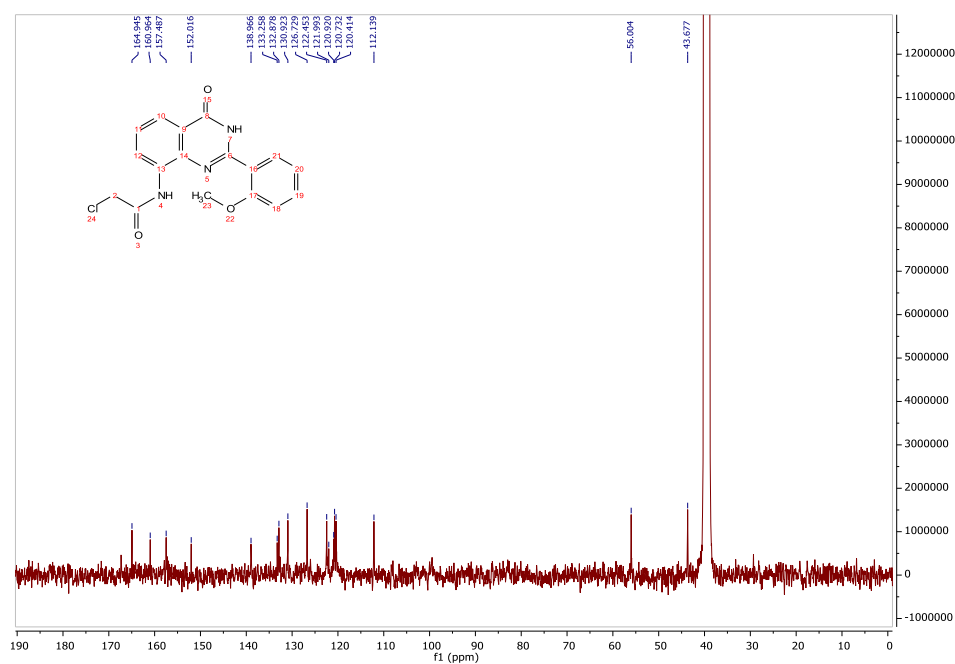

Figure S10: <sup>13</sup>C NMR spectrum of 13

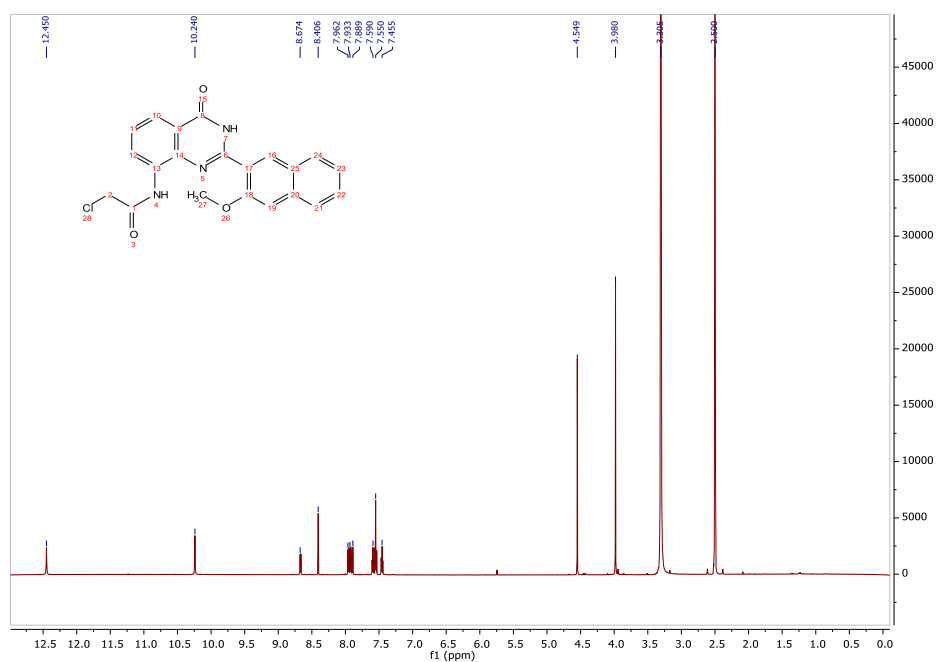

Figure S11: <sup>1</sup>H NMR spectrum of 14

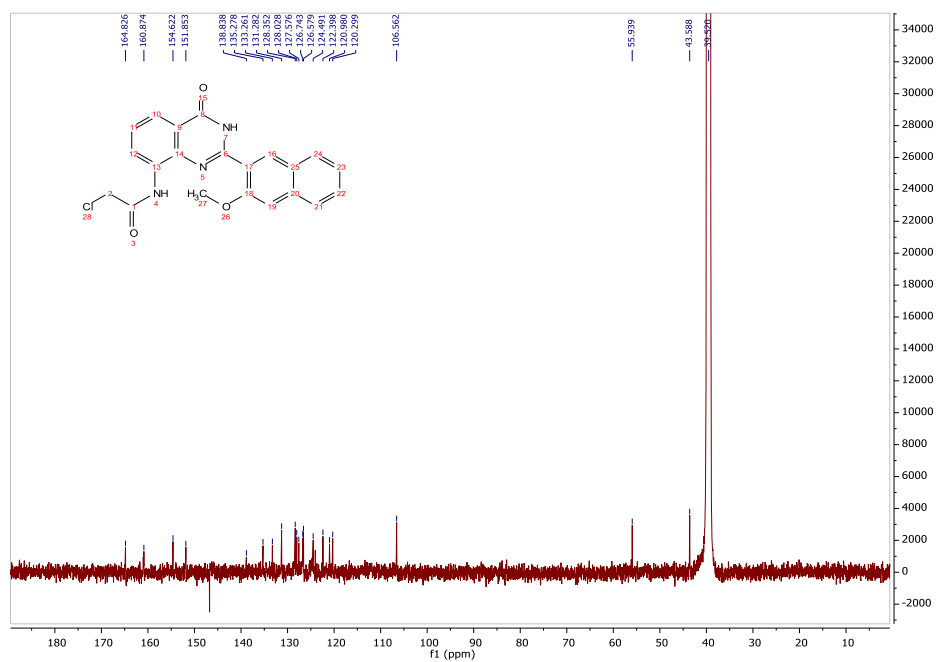

Figure S12: <sup>13</sup>C NMR spectrum of 14

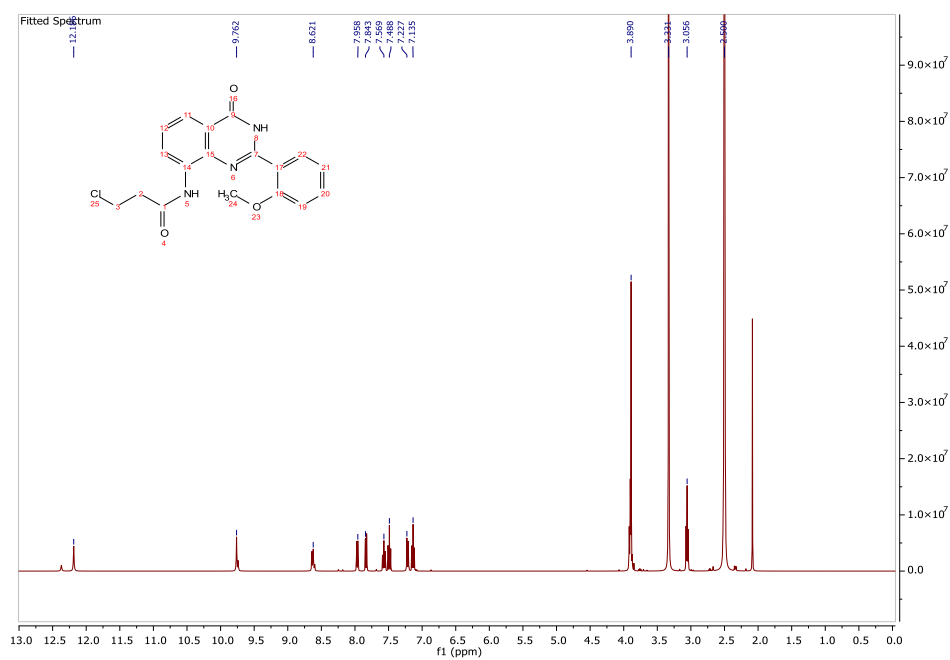

Figure S13:  $^1\text{H}$  NMR spectrum of 15

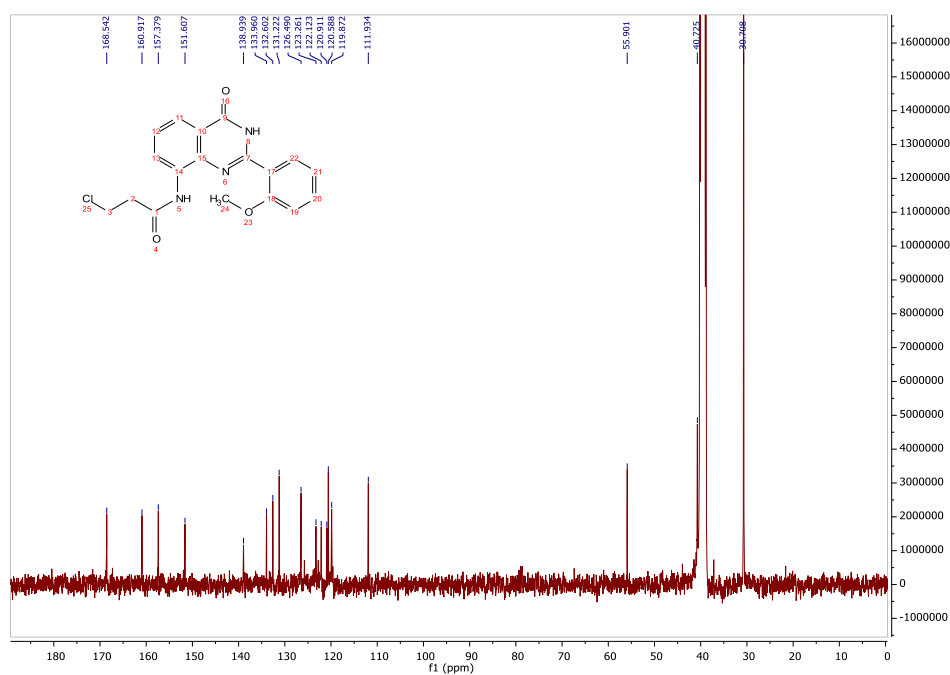

Figure S14:  $^{13}\text{C}$  NMR spectrum of 15

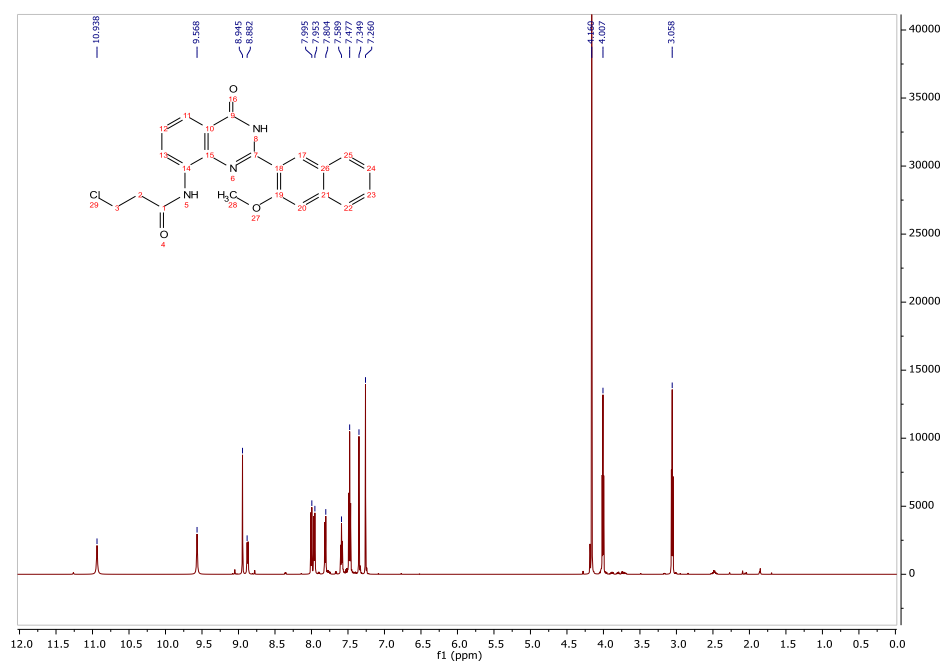

Figure S15: <sup>1</sup>H NMR spectrum of 16

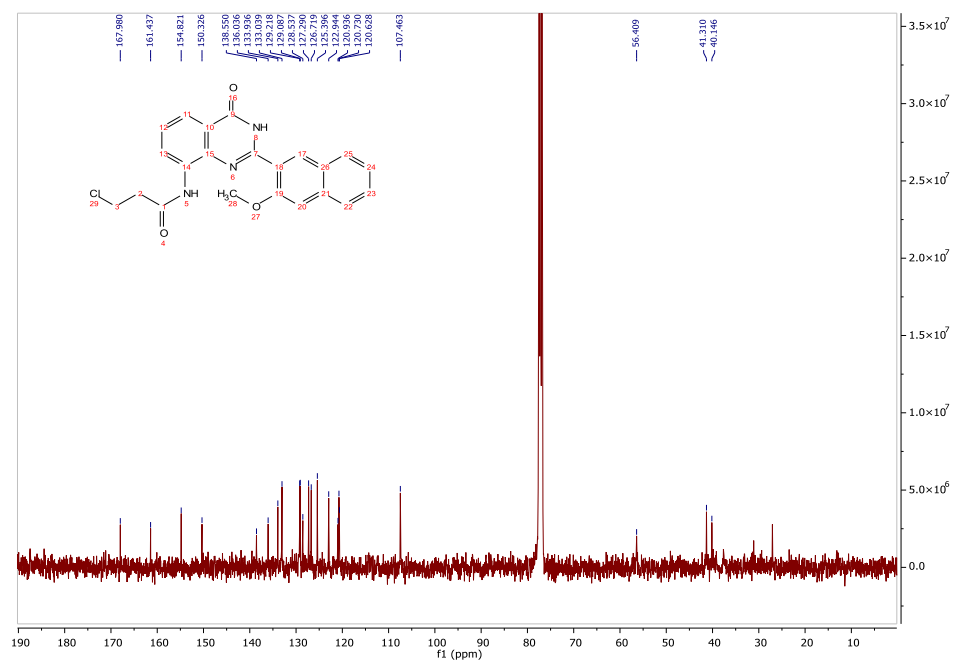

Figure S16: <sup>13</sup>C NMR spectrum of 16

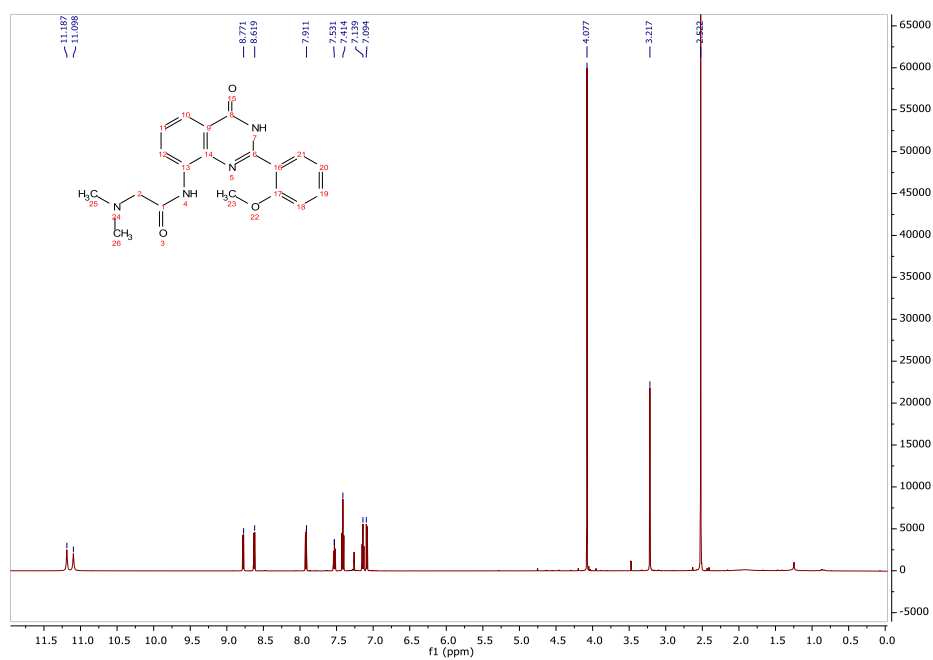

Figure S17:  $^1\text{H}$  NMR spectrum of 17

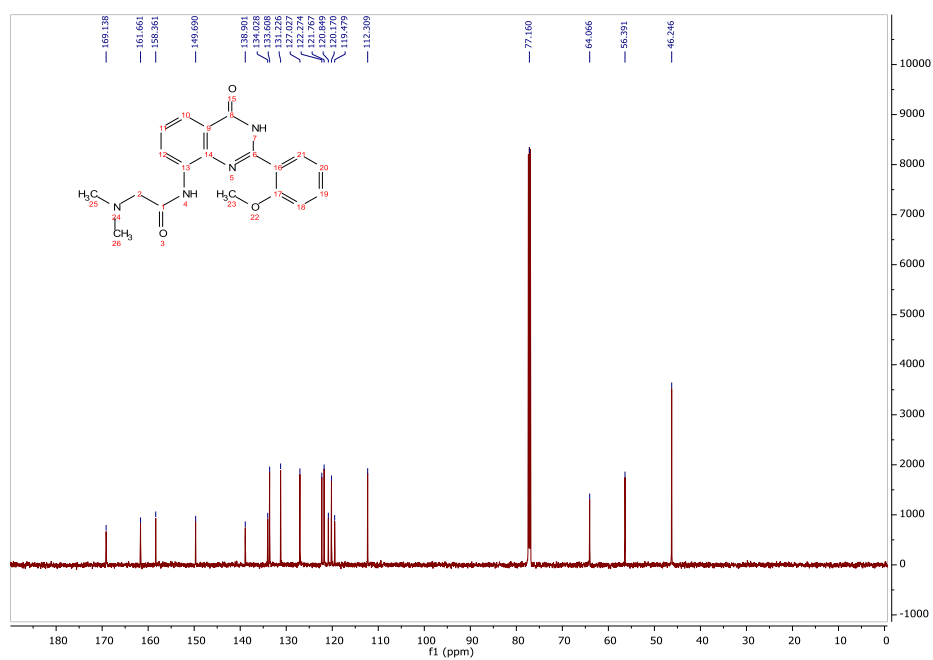

Figure S18:  $^{13}\text{C}$  NMR spectrum of 17

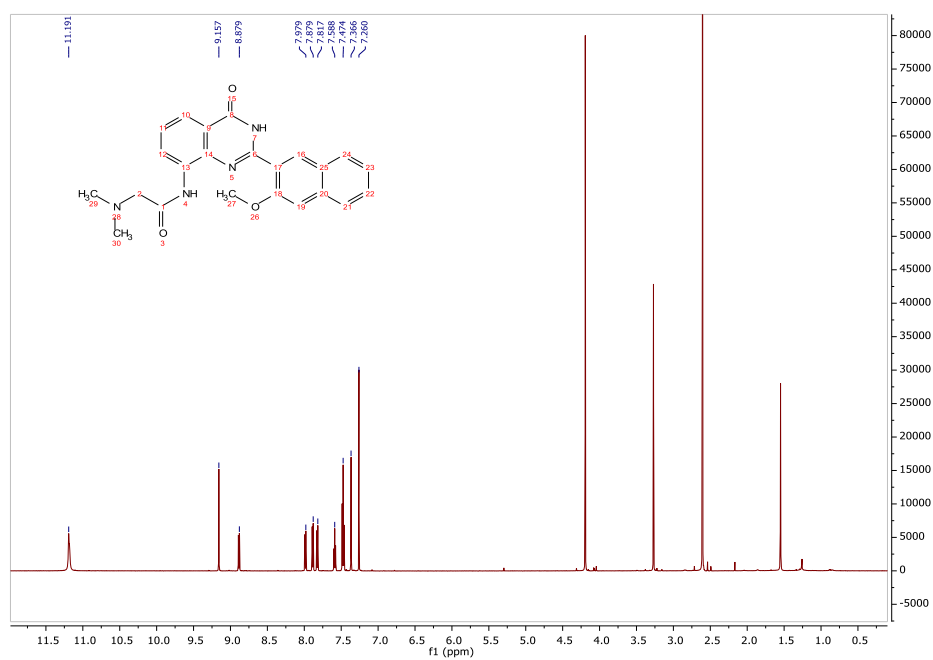

Figure S19:  $^1\text{H}$  NMR spectrum of 18

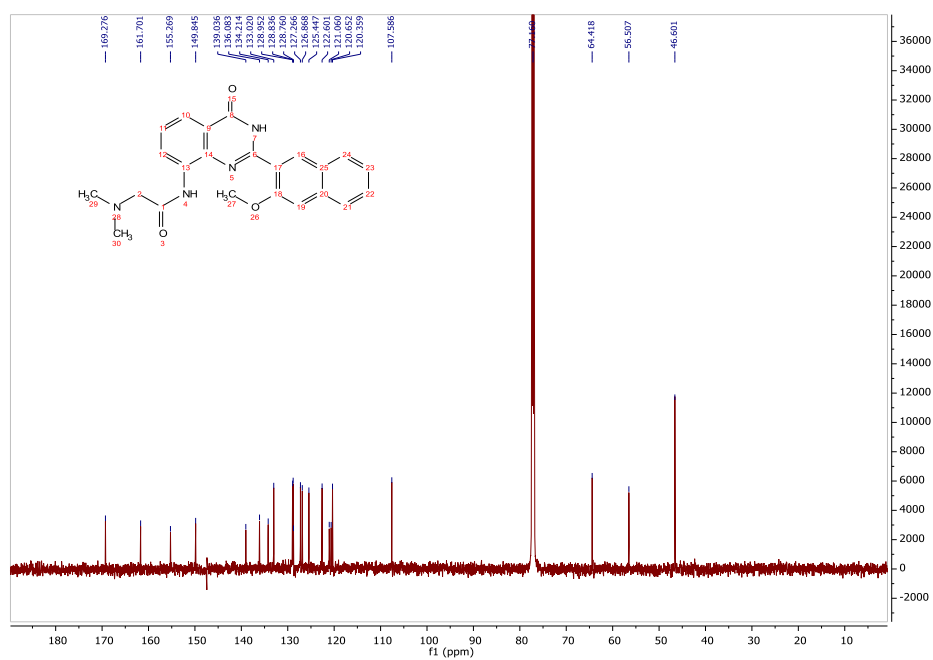

Figure S20:  $^{13}\text{C}$  NMR spectrum of 18



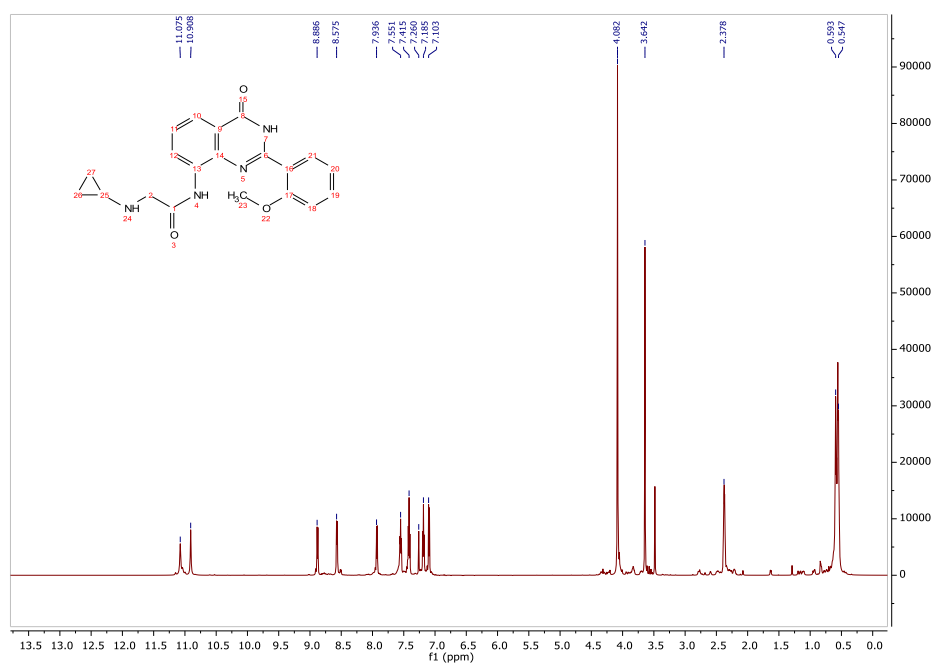

Figure S21: <sup>1</sup>H NMR spectrum of 19

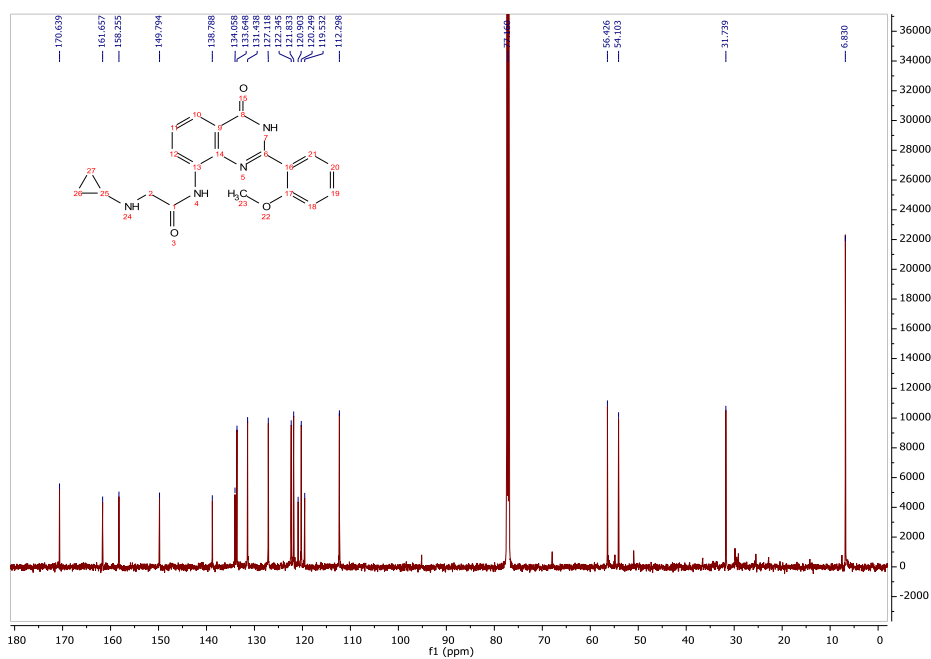

Figure S22: <sup>13</sup>C NMR spectrum of 19

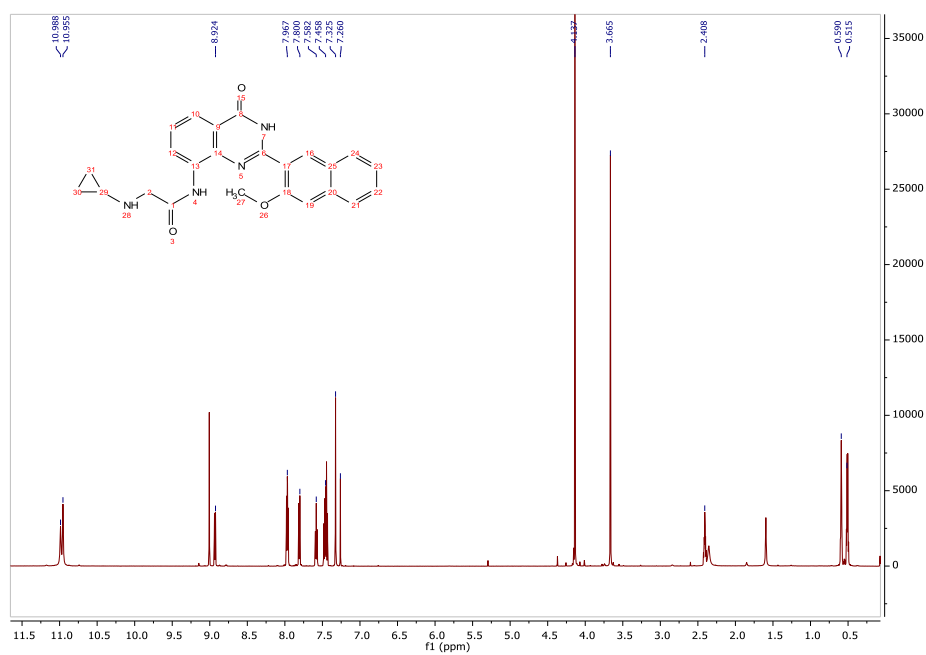

Figure S23: <sup>1</sup>H NMR spectrum of 20

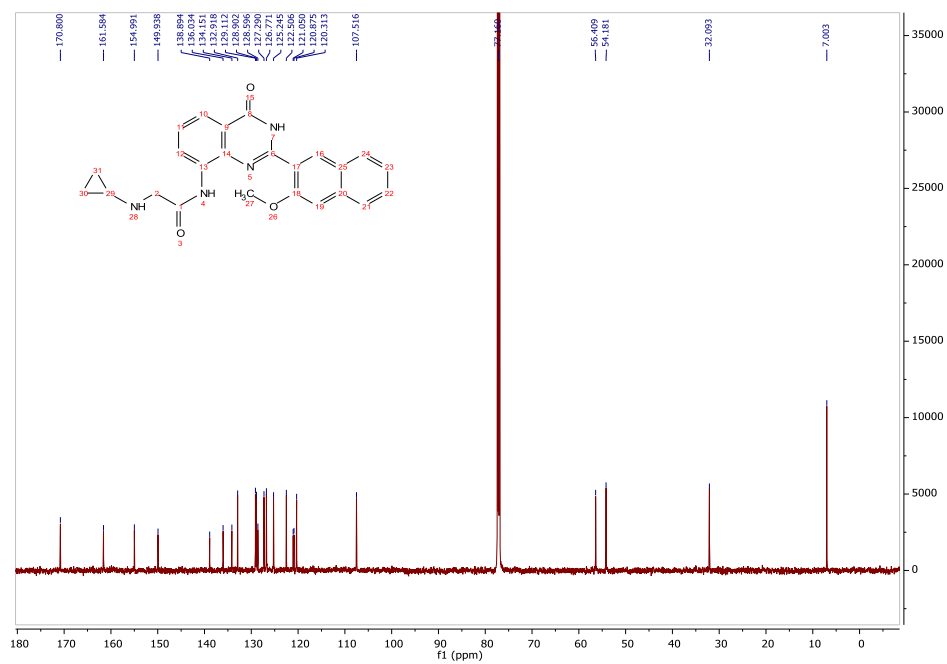

Figure S24: <sup>13</sup>C NMR spectrum of 20

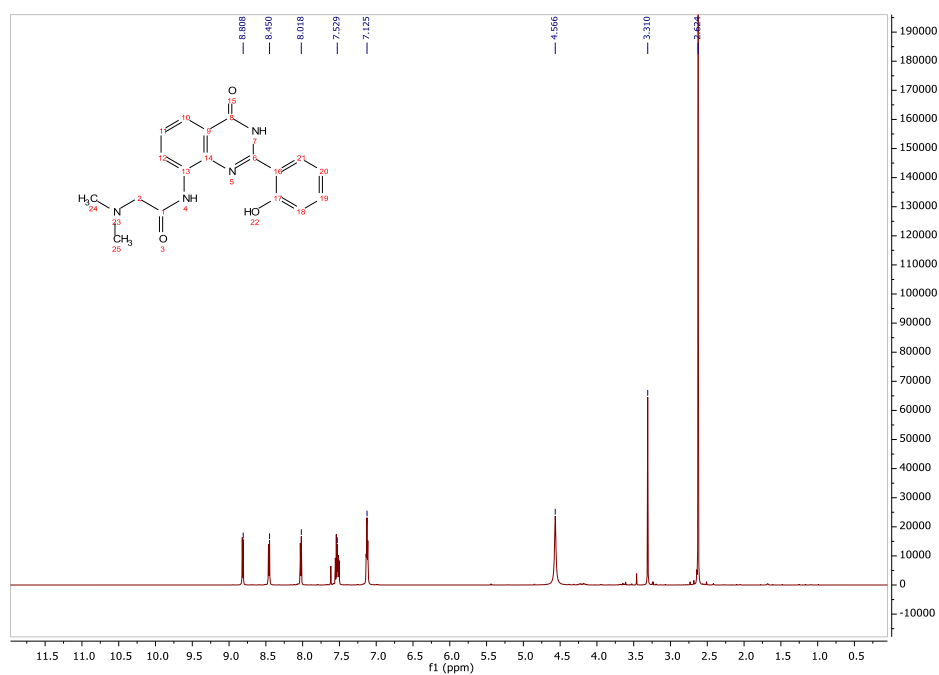

Figure S25:  $^1\text{H}$  NMR spectrum of 21

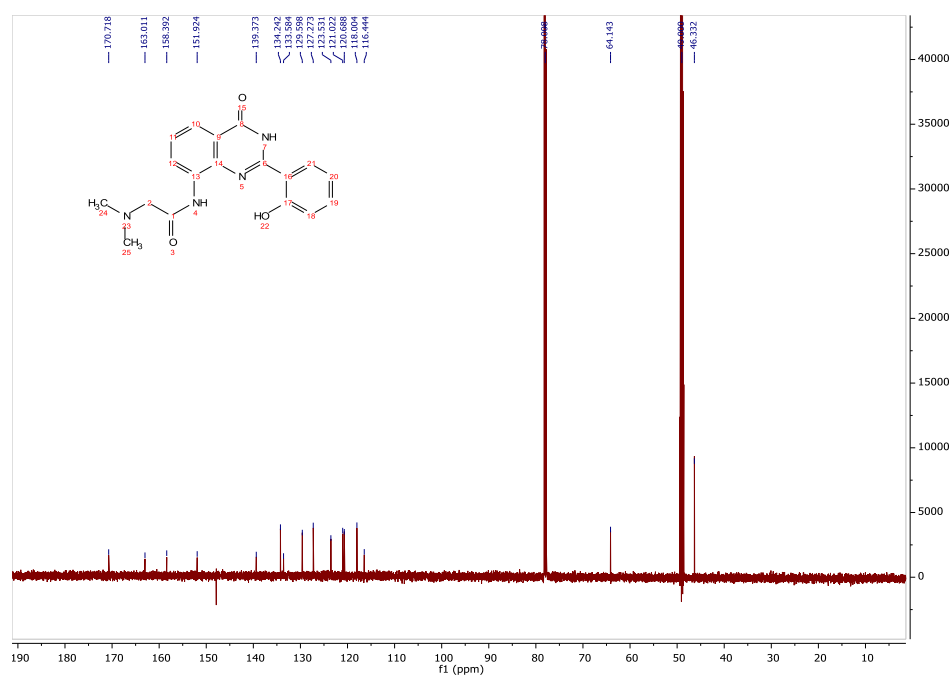

Figure S26:  $^{13}\text{C}$  NMR spectrum of 21

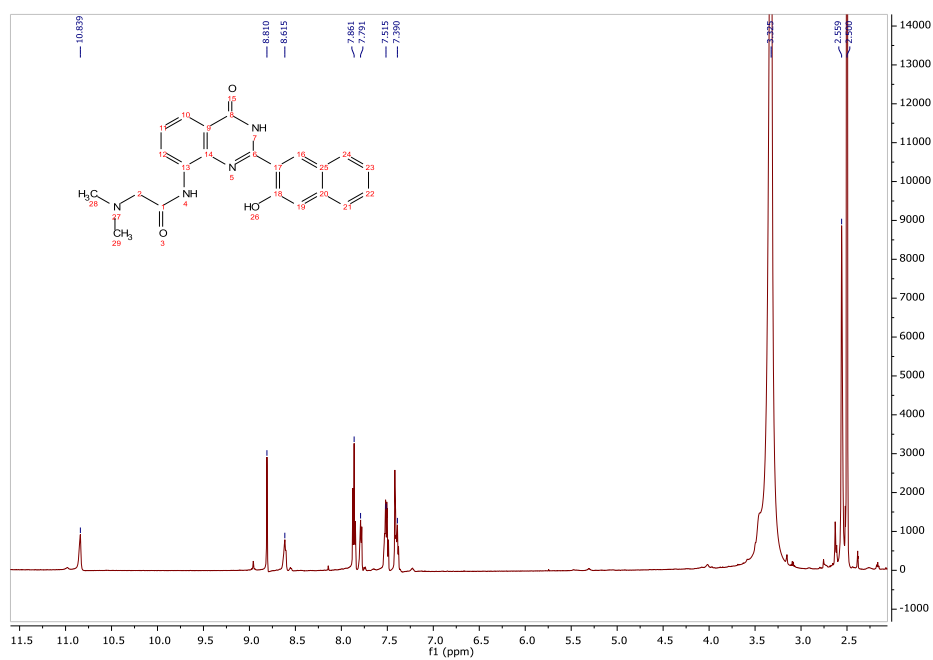

Figure S27:  $^1\text{H}$  NMR spectrum of 22

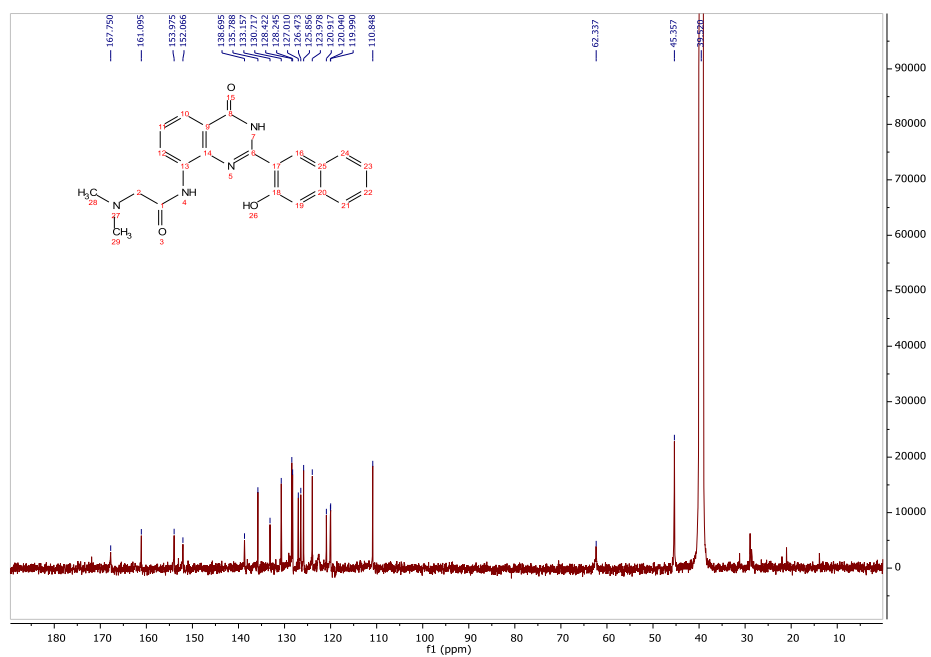

Figure S28:  $^{13}\text{C}$  NMR spectrum of 22

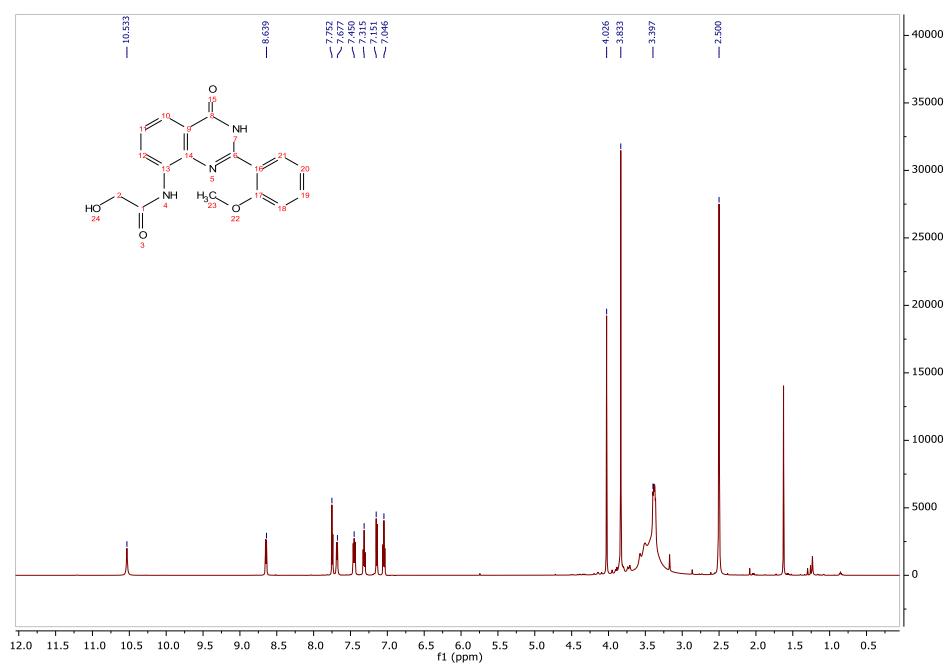

Figure S29: <sup>1</sup>H NMR spectrum of 25

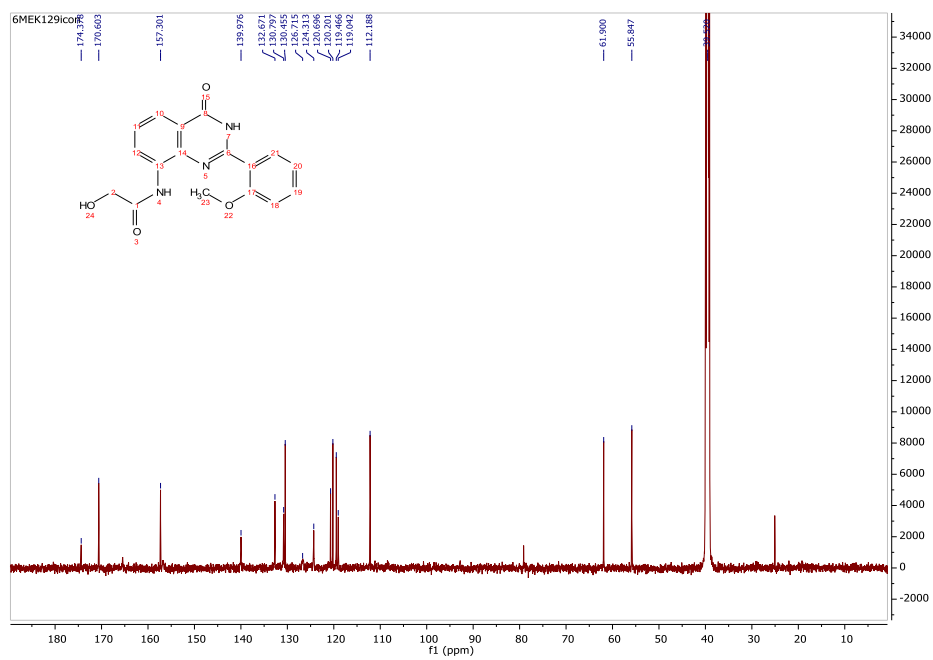

Figure S30: <sup>13</sup>C NMR spectrum of 25

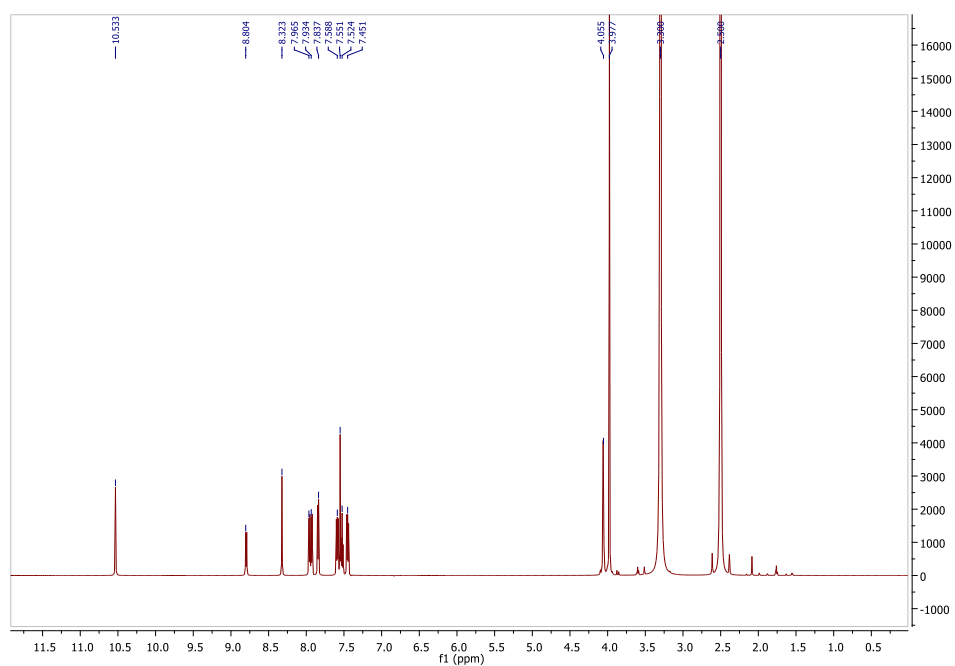

Figure S31:  $^1\text{H}$  NMR spectrum of 26

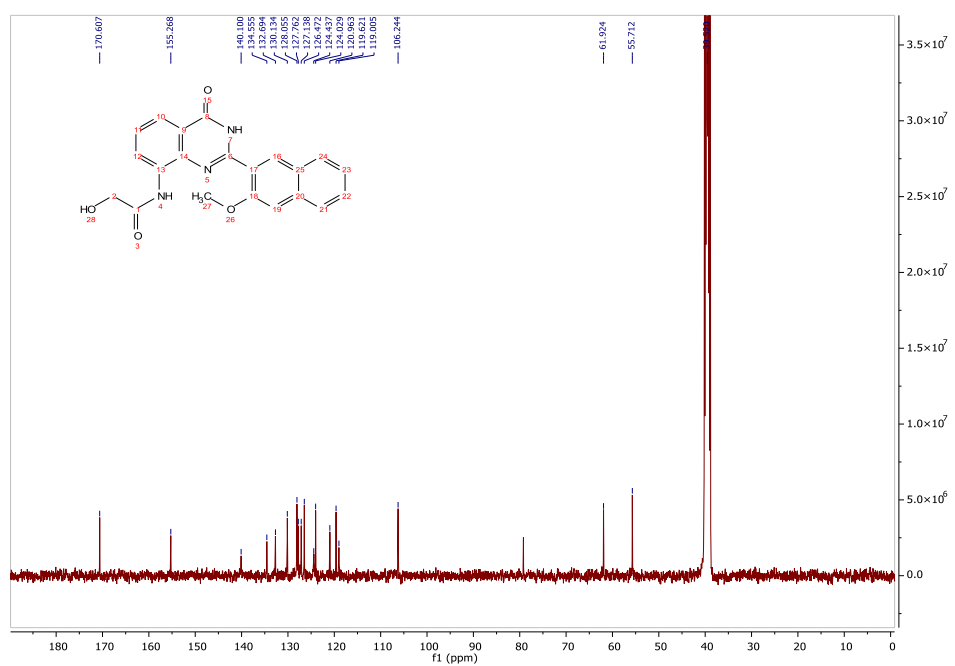

Figure S32:  $^{13}\text{C}$  NMR spectrum of 26

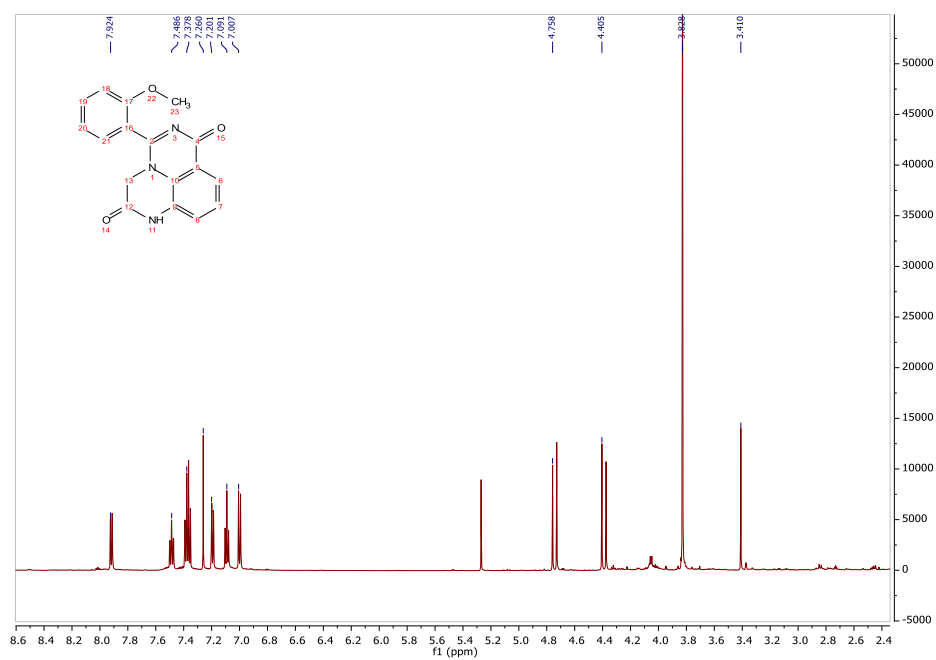

Figure S33:  $^1\text{H}$  NMR spectrum of 27

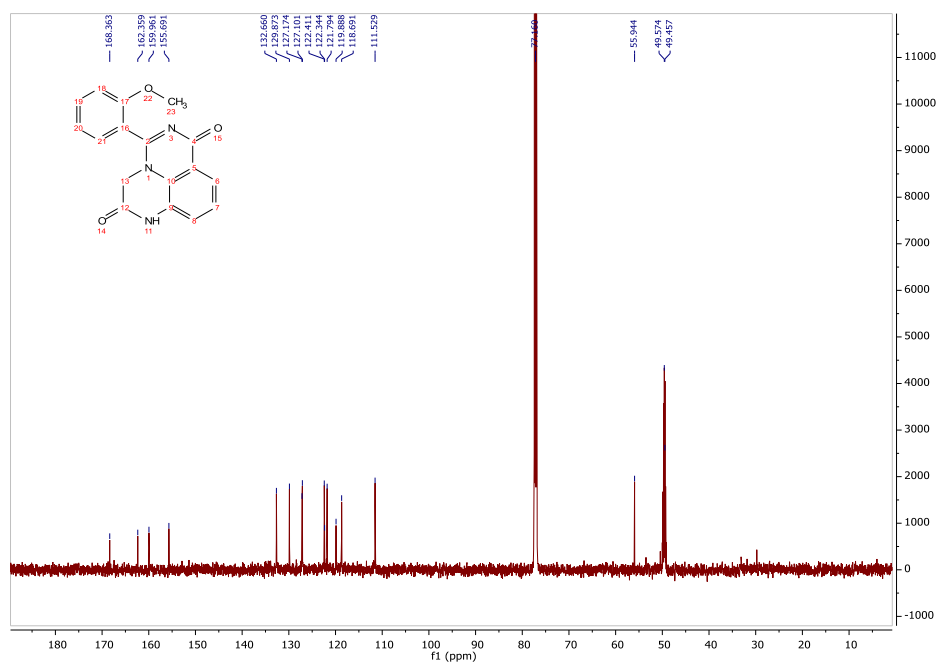

Figure S34:  $^{13}\text{C}$  NMR spectrum of 27

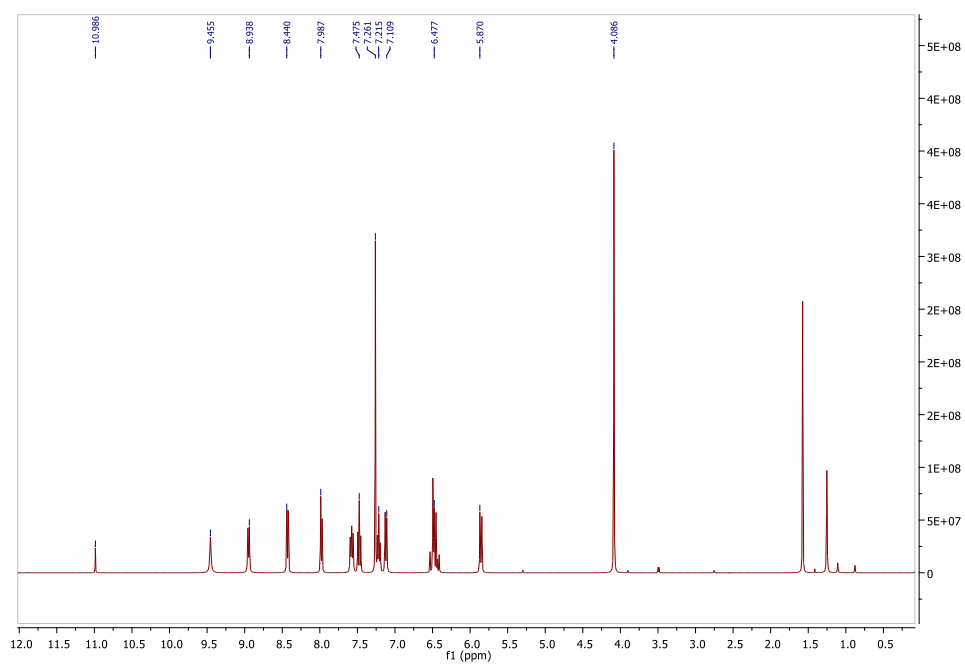

Figure S35:  $^1\text{H}$  NMR spectrum of 28

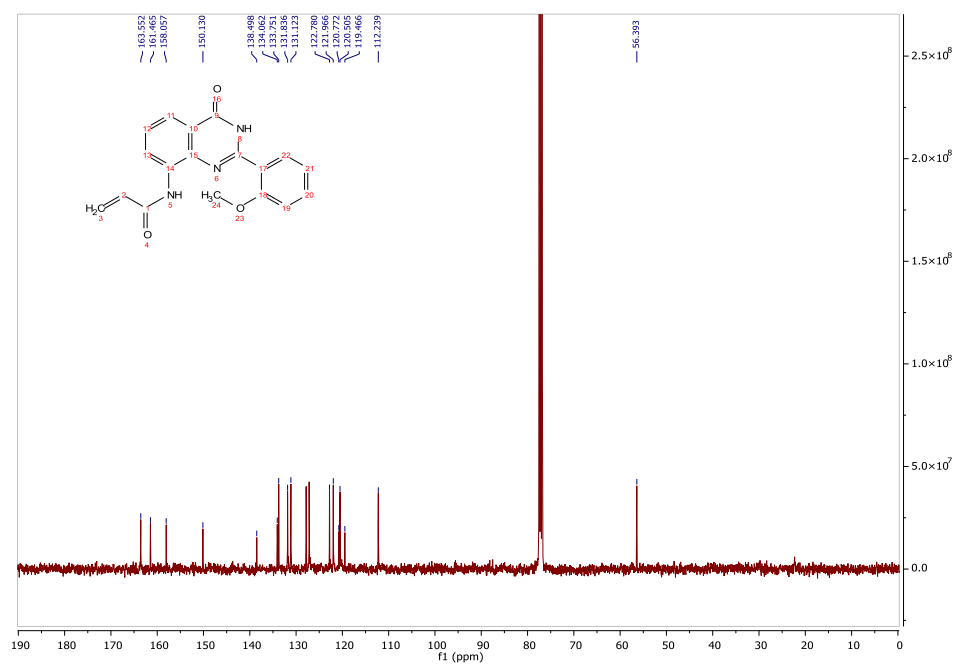

Figure S36:  $^{13}\text{C}$  NMR spectrum of 28



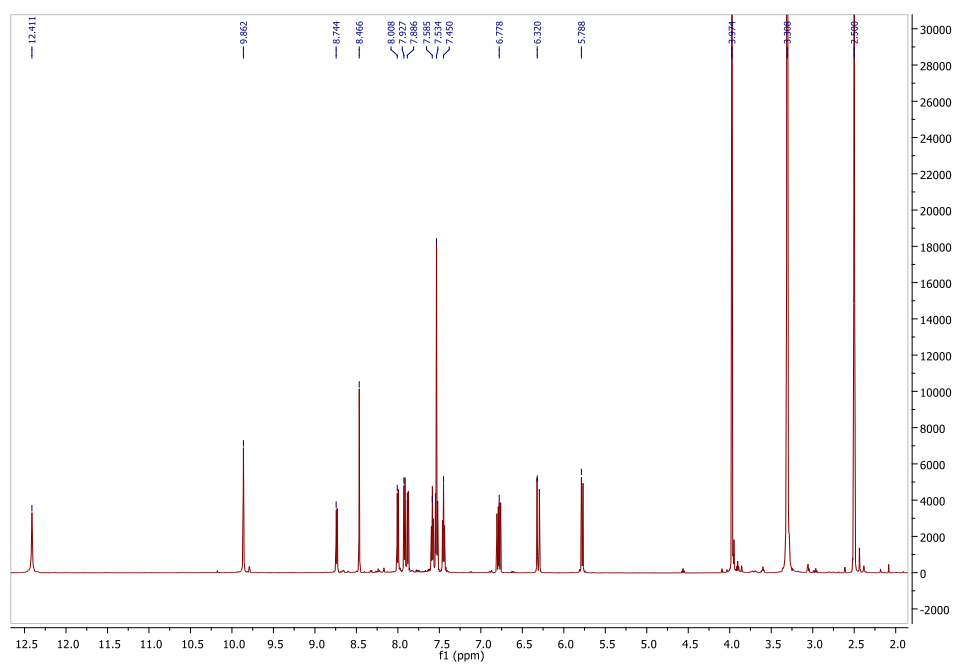

Figure S37:  $^1\text{H}$  NMR spectrum of 29

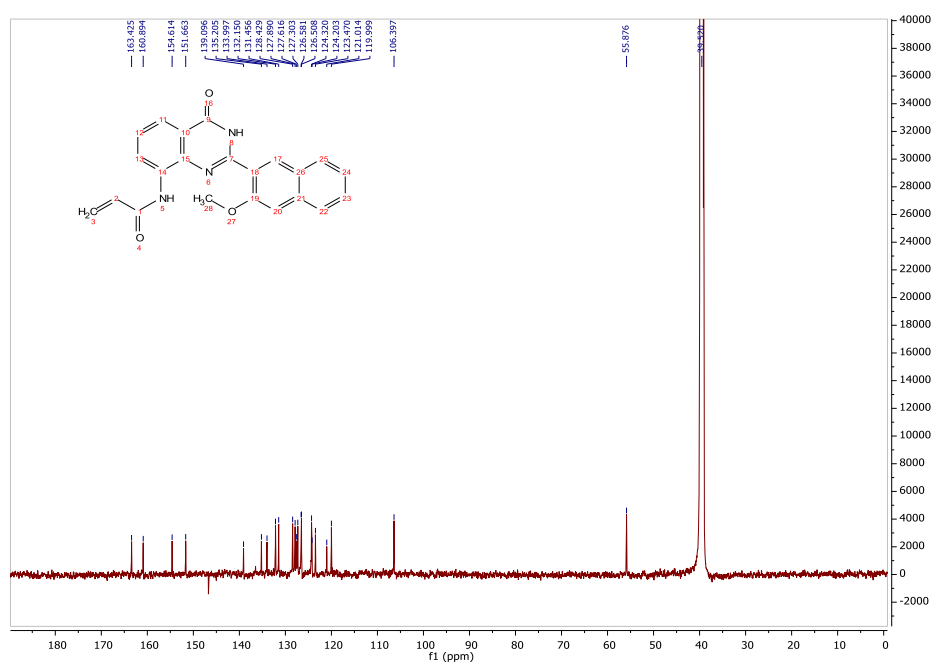

Figure S38:  $^{13}\text{C}$  NMR spectrum of 29

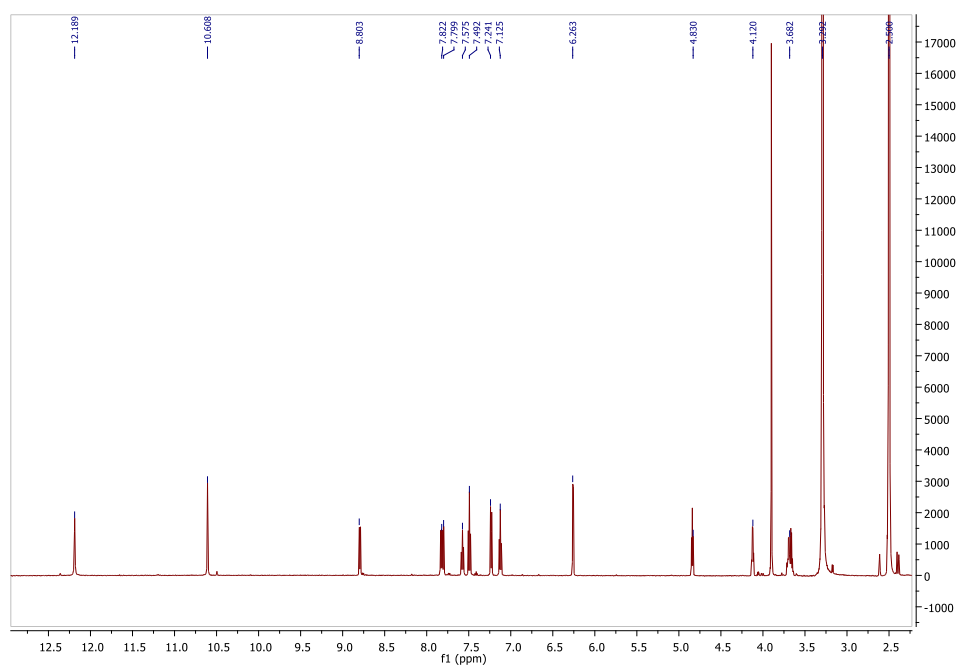

Figure S39:  $^1\text{H}$  NMR spectrum of 30

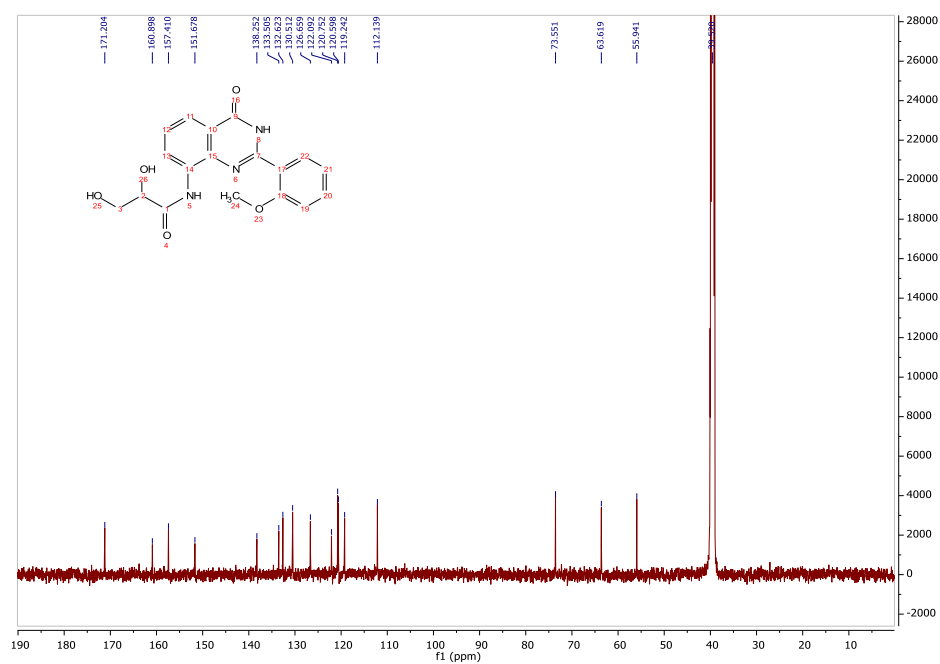

Figure S40:  $^{13}\text{C}$  NMR spectrum of 30

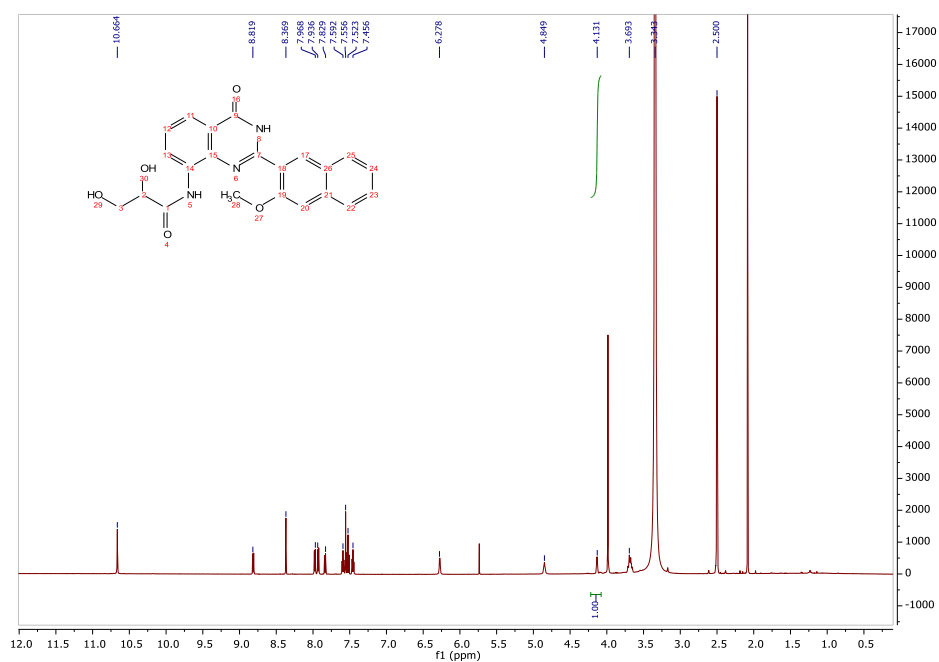

Figure S41: <sup>1</sup>H NMR spectrum of 31

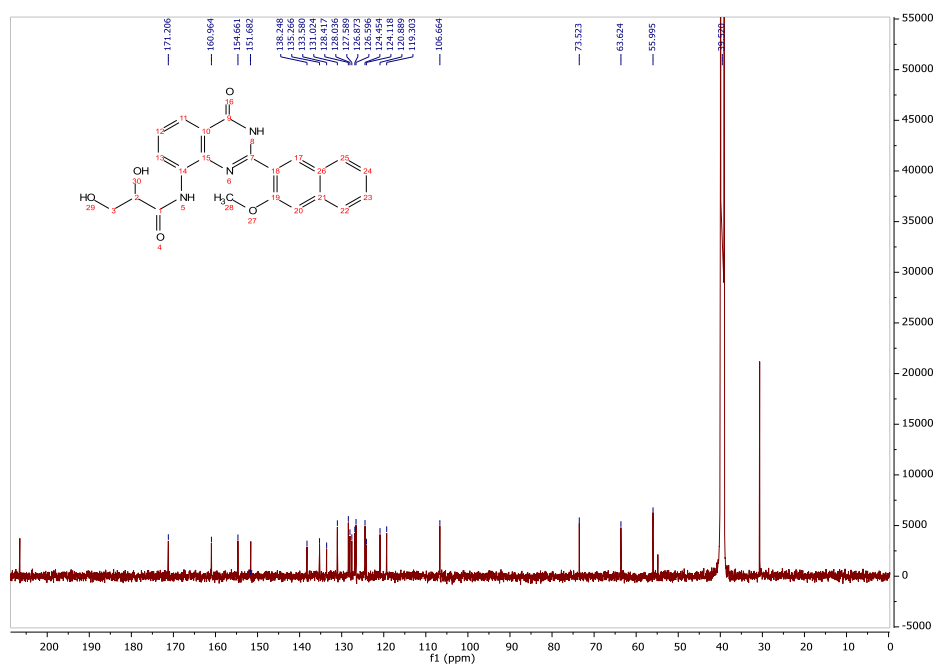

Figure S42: <sup>13</sup>C NMR spectrum of 31

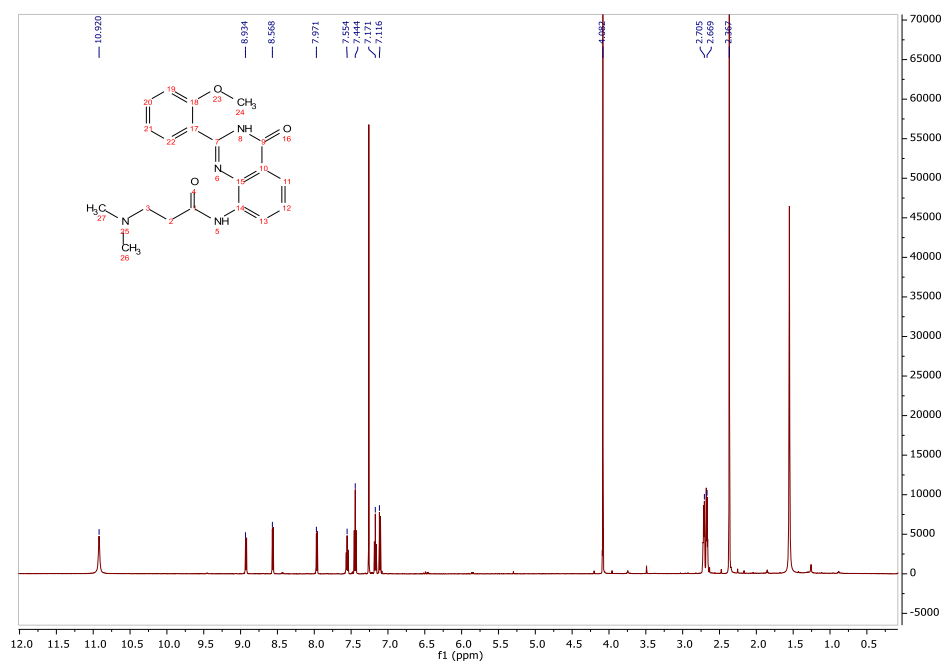

Figure S43:  $^1\text{H}$  NMR spectrum of 32

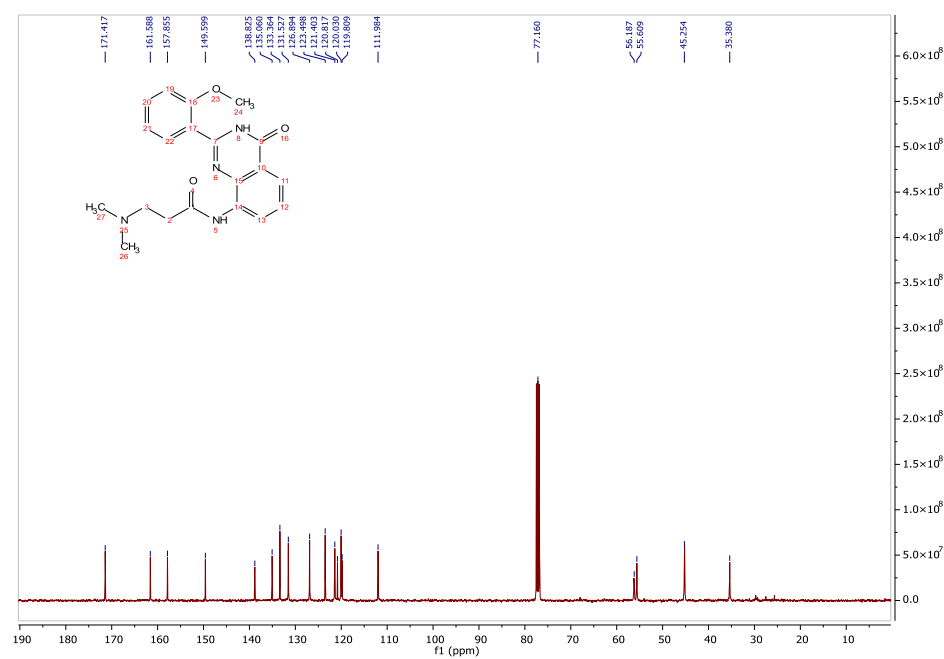

Figure S44:  $^{13}\text{C}$  NMR spectrum of 32

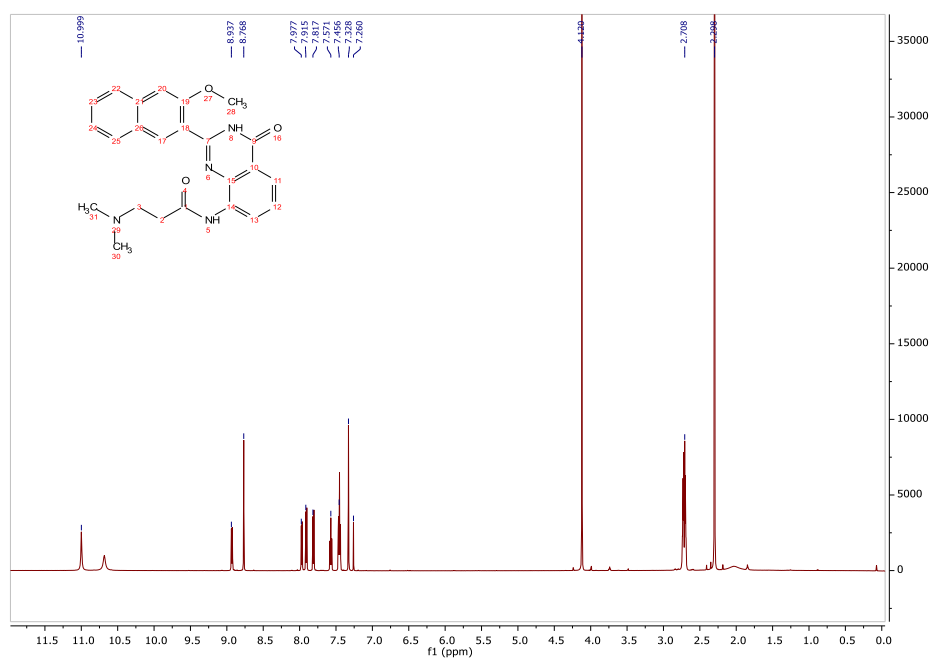

Figure S45: <sup>1</sup>H NMR spectrum of 33

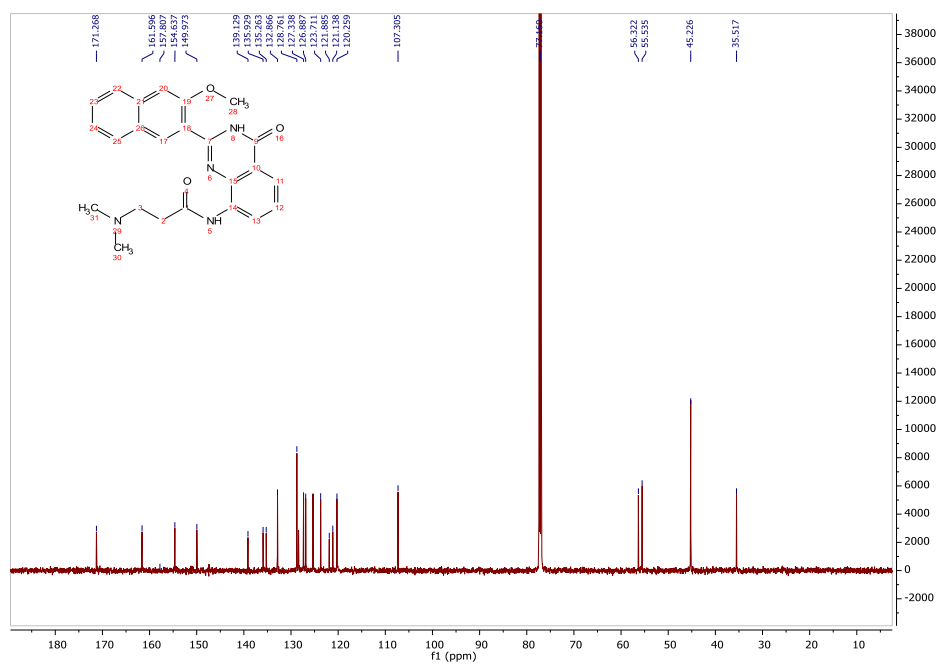

Figure S46: <sup>13</sup>C NMR spectrum of 33

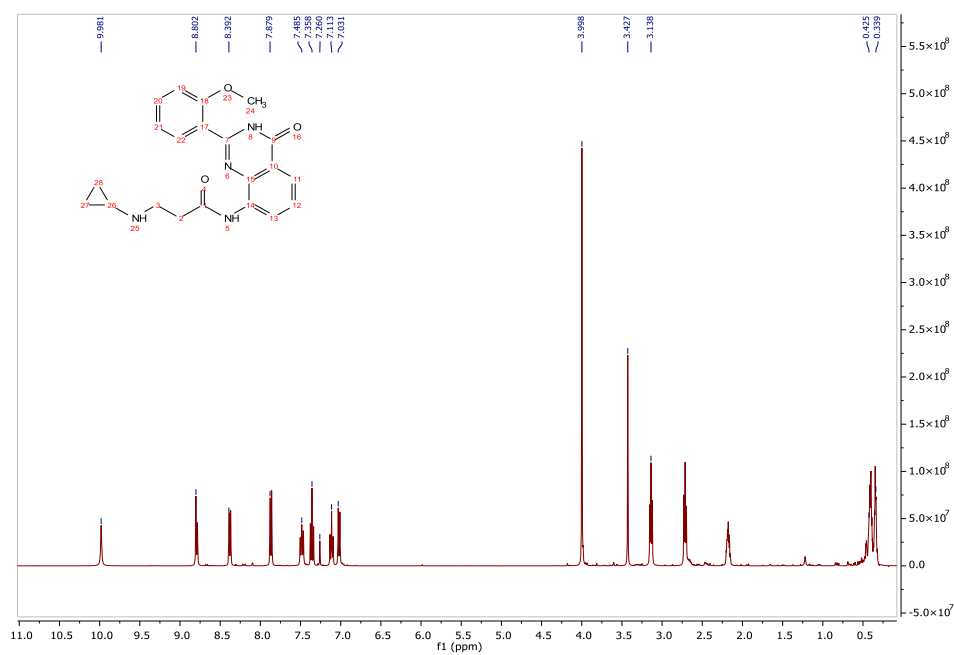

Figure S47:  $^1\text{H}$  NMR spectrum of 34

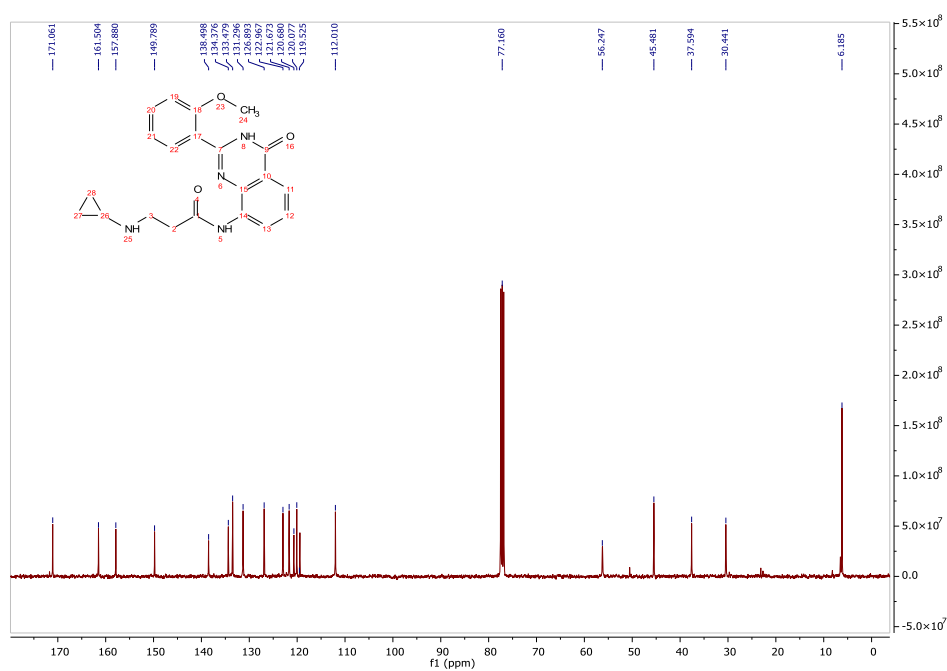

Figure S48:  $^{13}\text{C}$  NMR spectrum of 34

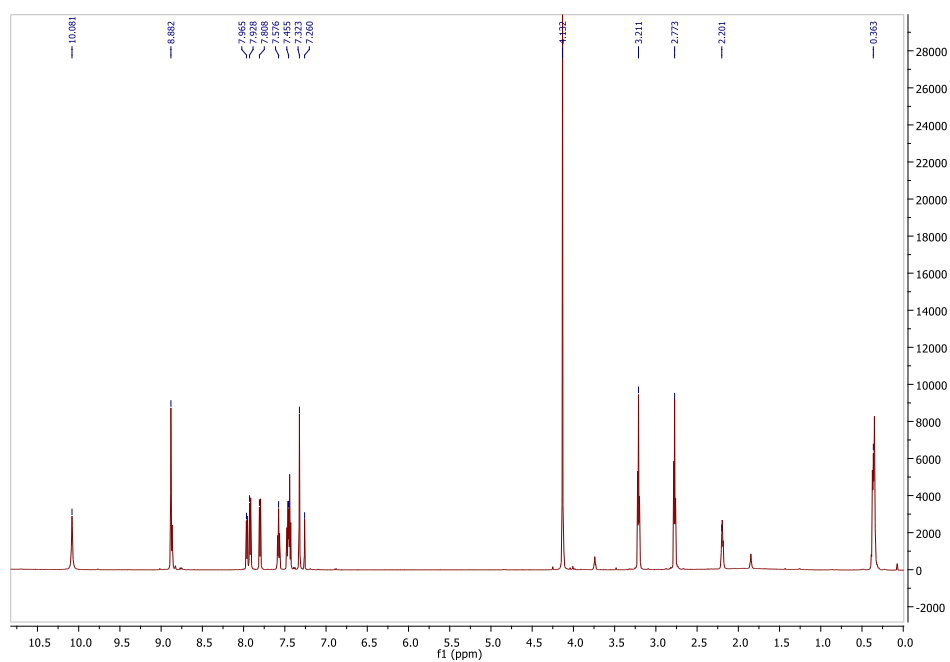

Figure S49:  $^1\text{H}$  NMR spectrum of 35

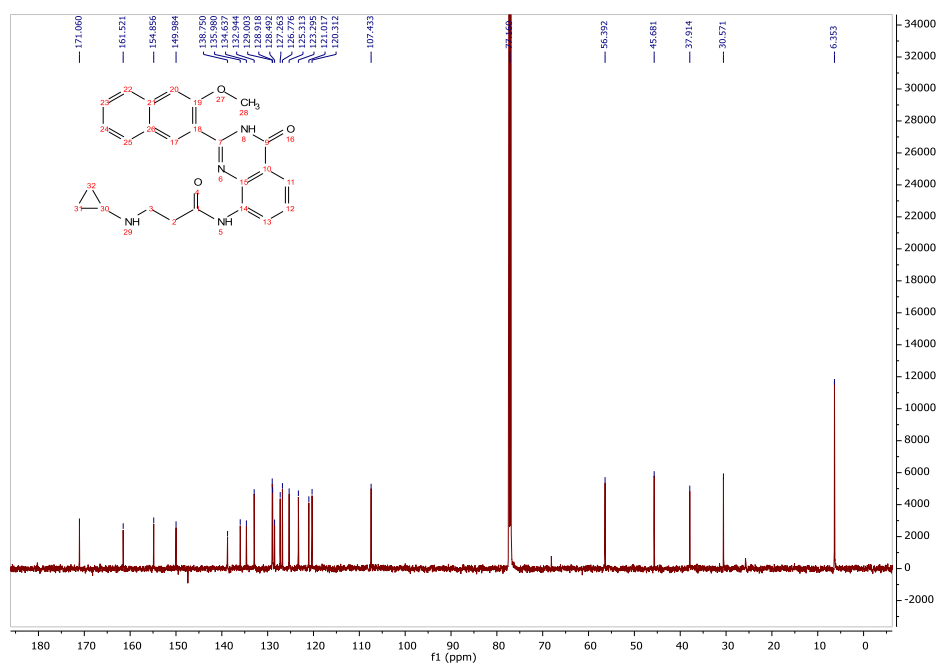

Figure S50:  $^{13}\text{C}$  NMR spectrum of 35

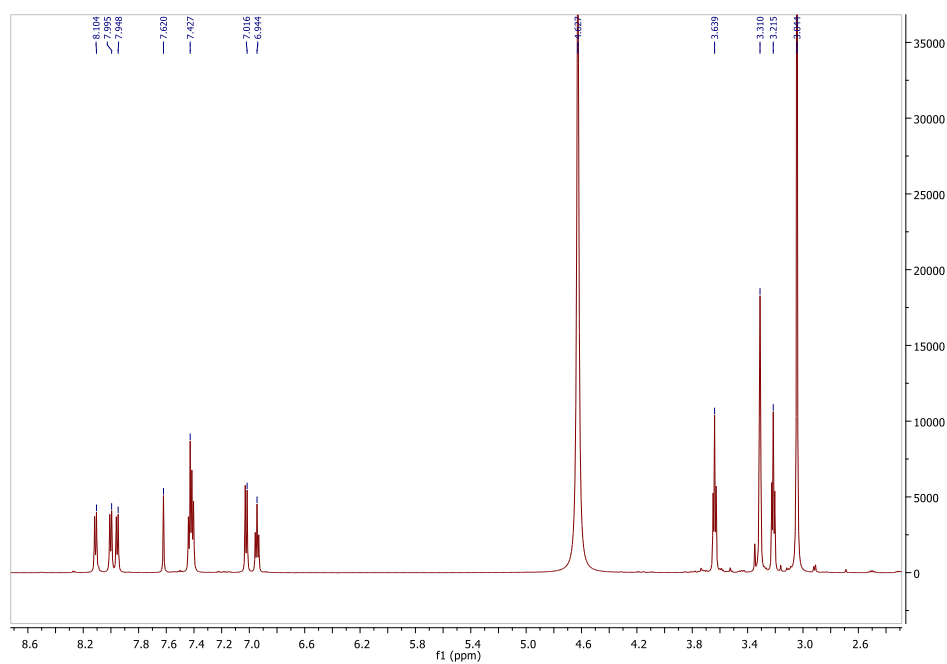

Figure S51:  $^1\text{H}$  NMR spectrum of 36

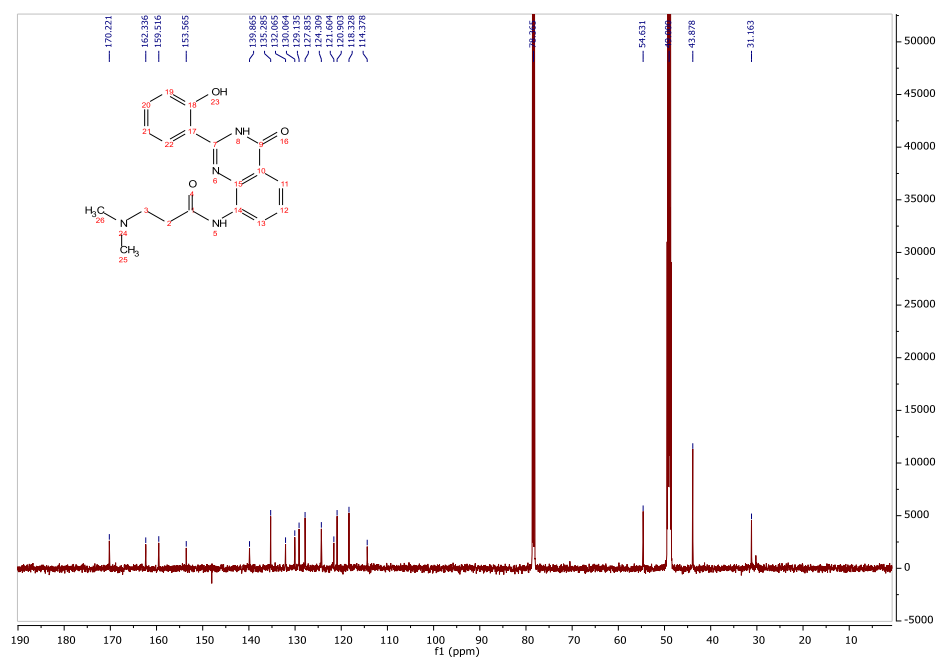

Figure S52:  $^{13}\text{C}$  NMR spectrum of 36
